# Supplementary material
Source: publisher figshare collection journal article supplement (https://gsapubs.figshare.com/ndownloader/files/24581651)
Supplement: Supplementary file 1 [file 24581651]

## Sheet: G47655
Li, X., et al., 2020, Implications of giant ooids for the carbonate chemistry of Early Triassic seawater: Geology, v. 49, https://doi.org/10.1130/G47655.1

## Sheet: Fig 2 - size distribution & GPS
Location	Sample	Ooid_ID	Major_axis length_mm	Minor_axis length_mm	Aspect_ratio	Source	GPS coordinates	Note
Great Bank of Guizhou	DXR-8(1)	1	3.701	3.113	1.18889	thin section	25.571388 N, 106.855555 E	DXR- 3 and DXR-8 were collected from the same location
Great Bank of Guizhou	DXR-8(1)	2	3.628	2.203	1.64685	thin section		M1 and M2 were collected from the same location
Great Bank of Guizhou	DXR-8(1)	3	3.176	2.431	1.30646	thin section
Great Bank of Guizhou	DXR-8(1)	4	5.59	3.792	1.47416	thin section
Great Bank of Guizhou	DXR-8(1)	5	2.718	2.125	1.27906	thin section
Great Bank of Guizhou	DXR-8(1)	6	1.829	1.34	1.36493	thin section
Great Bank of Guizhou	DXR-8(2)	1	3.01	2.79	1.07885	thin section
Great Bank of Guizhou	DXR-8(2)	2	4.947	4.634	1.06754	thin section
Great Bank of Guizhou	DXR-8(2)	3	4.146	1.838	2.25571	thin section
Great Bank of Guizhou	DXR-8(2)	4	2.499	2.181	1.1458	thin section
Great Bank of Guizhou	DXR-8(2)	5	4.59	2.233	2.05553	thin section
Great Bank of Guizhou	DXR-8(3)	1	4.062	3.087	1.31584	thin section
Great Bank of Guizhou	DXR-8(3)	2	2.491	1.69	1.47396	thin section
Great Bank of Guizhou	DXR-8(3)	3	6.22	2.517	2.4712	thin section
Great Bank of Guizhou	DXR-8(3)	4	3.042	2.844	1.06962	thin section
Great Bank of Guizhou	DXR-8(3)	5	3.055	3.019	1.01192	thin section
Great Bank of Guizhou	DXR-8(4)	1	2.69	2.139	1.2576	thin section
Great Bank of Guizhou	DXR-8(4)	2	3.64	2.666	1.36534	thin section
Great Bank of Guizhou	DXR-8(4)	3	6.717	5.403	1.2432	thin section
Great Bank of Guizhou	DXR-8(4)	4	2.281	1.314	1.73592	thin section
Great Bank of Guizhou	DXR-8(5)	1	3.014	2.31	1.30476	thin section
Great Bank of Guizhou	DXR-8(5)	2	2.994	2.751	1.08833	thin section
Great Bank of Guizhou	DXR-8(5)	3	4.016	2.412	1.66501	thin section
Great Bank of Guizhou	DXR-8(5)	4	3.962	3.545	1.11763	thin section
Great Bank of Guizhou	DXR-8(6)	1	5.174	5.13	1.00858	thin section
Great Bank of Guizhou	DXR-8(6)	2	3.182	2.111	1.50734	thin section
Great Bank of Guizhou	DXR-8(6)	3	4.661	4.344	1.07297	thin section
Great Bank of Guizhou	DXR-8(6)	4	4.341	2.474	1.75465	thin section
Great Bank of Guizhou	DXR-8(6)	5	2.639	2.144	1.23088	thin section
Great Bank of Guizhou	DXR-8(6)	6	5.612	3.842	1.4607	thin section
Great Bank of Guizhou	DXR3	1	7.176	6.181	1.16098	polished rock slab
Great Bank of Guizhou	DXR3	2	4.684	3.112	1.50514	polished rock slab
Great Bank of Guizhou	DXR3	3	5.558	3.404	1.63278	polished rock slab
Great Bank of Guizhou	DXR3	4	6.71	6.107	1.09874	polished rock slab
Great Bank of Guizhou	DXR3	5	3.145	2.53	1.24308	polished rock slab
Great Bank of Guizhou	DXR3	6	4.839	3.867	1.25136	polished rock slab
Great Bank of Guizhou	DXR3	7	4.692	2.936	1.59809	polished rock slab
Great Bank of Guizhou	DXR3	8	7.902	7.189	1.09918	polished rock slab
Great Bank of Guizhou	DXR3	9	3.883	3.295	1.17845	polished rock slab
Great Bank of Guizhou	DXR3	10	3.759	3.295	1.14082	polished rock slab
Great Bank of Guizhou	DXR3	11	3.925	3.628	1.08186	polished rock slab
Great Bank of Guizhou	DXR3	12	5.083	4.21	1.20736	polished rock slab
Great Bank of Guizhou	DXR3	13	8.541	7.546	1.13186	polished rock slab
Great Bank of Guizhou	DXR3	14	5.87	5.08	1.15551	polished rock slab
Great Bank of Guizhou	DXR3	15	6.23	5.33	1.16886	polished rock slab
Great Bank of Guizhou	DXR3	16	4.234	3.283	1.28967	polished rock slab
Great Bank of Guizhou	DXR3	17	4.509	3.701	1.21832	polished rock slab
Great Bank of Guizhou	DXR3	18	5.572	5.329	1.0456	polished rock slab
Great Bank of Guizhou	DXR3	19	6.558	5.192	1.2631	polished rock slab
Great Bank of Guizhou	DXR3	20	3.127	2.484	1.25886	polished rock slab
Great Bank of Guizhou	DXR3	21	8.174	7.339	1.11378	polished rock slab
Great Bank of Guizhou	DXR3	22	4.51	3.176	1.42003	polished rock slab
Great Bank of Guizhou	DXR3	23	4.616	4.126	1.11876	polished rock slab
Great Bank of Guizhou	DXR3	24	5.119	4.531	1.12977	polished rock slab
Great Bank of Guizhou	DXR3	25	6.486	5.526	1.17372	polished rock slab
Great Bank of Guizhou	DXR3	26	5.141	4.723	1.0885	polished rock slab
Great Bank of Guizhou	DXR3	27	7.669	5.687	1.34851	polished rock slab
Great Bank of Guizhou	DXR3	28	8.482	7.441	1.1399	polished rock slab
Great Bank of Guizhou	DXR3	29	4.752	4.741	1.00232	polished rock slab
Great Bank of Guizhou	DXR3	30	5.26	4.644	1.13264	polished rock slab
Great Bank of Guizhou	DXR3	31	4.952	4.148	1.19383	polished rock slab
Great Bank of Guizhou	DXR3	32	4.046	3.278	1.23429	polished rock slab
Great Bank of Guizhou	DXR3	33	5.354	4.833	1.1078	polished rock slab
Great Bank of Guizhou	DXR3	34	3.629	3.346	1.08458	polished rock slab
Great Bank of Guizhou	DXR3	35	4.907	4.006	1.22491	polished rock slab
Great Bank of Guizhou	DXR3	36	3.824	3.503	1.09164	polished rock slab
Great Bank of Guizhou	DXR3	37	4.594	3.6	1.27611	polished rock slab
Great Bank of Guizhou	DXR3	38	4.671	4.426	1.05535	polished rock slab
Great Bank of Guizhou	DXR3	39	9.291	8.461	1.0981	polished rock slab
Great Bank of Guizhou	DXR3	40	4.801	3.715	1.29233	polished rock slab
Great Bank of Guizhou	DXR3	41	2.962	2.198	1.34759	polished rock slab
Great Bank of Guizhou	DXR3	42	2.943	2.868	1.02615	polished rock slab
Great Bank of Guizhou	DXR3	43	4.108	3.808	1.07878	polished rock slab
Great Bank of Guizhou	DXR3	44	4.658	3.553	1.311	polished rock slab
Great Bank of Guizhou	DXR3	45	2.342	2.214	1.05781	polished rock slab
Great Bank of Guizhou	DXR3	46	2.645	2.211	1.19629	polished rock slab
Great Bank of Guizhou	DXR3	47	6.481	6.139	1.05571	polished rock slab
Great Bank of Guizhou	DXR3	48	2.91	2.689	1.08219	polished rock slab
Great Bank of Guizhou	DXR3	49	2.127	2.004	1.06138	polished rock slab
Great Bank of Guizhou	DXR3	50	3.708	2.762	1.34251	polished rock slab
Great Bank of Guizhou	DXR3	51	7.488	4.301	1.74099	polished rock slab
Great Bank of Guizhou	DXR3	52	4.488	3.32	1.35181	polished rock slab
Great Bank of Guizhou	DXR3	53	3.24	2.797	1.15838	polished rock slab
Great Bank of Guizhou	DXR3	54	2.687	1.848	1.454	polished rock slab
Great Bank of Guizhou	DXR3	55	2.838	2.203	1.28824	polished rock slab
Great Bank of Guizhou	DXR3	56	2.169	1.861	1.1655	polished rock slab
Great Bank of Guizhou	DXR3	57	2.479	1.941	1.27718	polished rock slab
Great Bank of Guizhou	DXR3	58	4.843	3.889	1.24531	polished rock slab
Great Bank of Guizhou	DXR3	59	4.503	4.098	1.09883	polished rock slab
Great Bank of Guizhou	DXR3	60	2.057	1.664	1.23618	polished rock slab
Great Bank of Guizhou	DXR3	61	2.865	2.28	1.25658	polished rock slab
Great Bank of Guizhou	DXR3	62	2.473	2.129	1.16158	polished rock slab
Great Bank of Guizhou	DXR3	63	3.662	2.246	1.63045	polished rock slab
Great Bank of Guizhou	DXR3	64	5.394	4.594	1.17414	polished rock slab
Great Bank of Guizhou	DXR3	65	3.434	3.285	1.04536	polished rock slab
Great Bank of Guizhou	DXR3	66	6.582	5.822	1.13054	polished rock slab
Great Bank of Guizhou	DXR3	67	2.991	2.854	1.048	polished rock slab
Great Bank of Guizhou	DXR3	68	5.169	4.465	1.15767	polished rock slab
Great Bank of Guizhou	DXR3	69	2.725	2.15	1.26744	polished rock slab
Great Bank of Guizhou	DXR3	70	3.171	2.575	1.23146	polished rock slab
Great Bank of Guizhou	DXR3	71	2.405	2.116	1.13658	polished rock slab
Great Bank of Guizhou	DXR3	72	2.882	2.874	1.00278	polished rock slab
Great Bank of Guizhou	DXR3	73	4.055	3.391	1.19581	polished rock slab
Great Bank of Guizhou	DXR3	74	2.462	1.725	1.42725	polished rock slab
Great Bank of Guizhou	DXR3	75	6.797	5.818	1.16827	polished rock slab
Great Bank of Guizhou	DXR3	76	2.859	2.466	1.15937	polished rock slab
Great Bank of Guizhou	DXR3	77	2.744	2.033	1.34973	polished rock slab
Great Bank of Guizhou	DXR3	78	3.38	3.258	1.03745	polished rock slab
Great Bank of Guizhou	DXR3	79	3.217	2.67	1.20487	polished rock slab
Great Bank of Guizhou	DXR3	80	3.369	2.398	1.40492	polished rock slab
Great Bank of Guizhou	DXR3	81	6.039	4.609	1.31026	polished rock slab
Great Bank of Guizhou	DXR3	82	4.899	3.332	1.47029	polished rock slab
Great Bank of Guizhou	DXR3	83	3.138	2.549	1.23107	polished rock slab
Great Bank of Guizhou	DXR3	84	4.221	2.982	1.41549	polished rock slab
Great Bank of Guizhou	DXR3	85	2.578	2.035	1.26683	polished rock slab
Great Bank of Guizhou	DXR3	86	2.864	1.729	1.65645	polished rock slab
Great Bank of Guizhou	DXR3	87	3.798	2.665	1.42514	polished rock slab
Great Bank of Guizhou	DXR3	88	7.757	6.341	1.22331	polished rock slab
Great Bank of Guizhou	DXR3	89	4.006	2.837	1.41205	polished rock slab
Great Bank of Guizhou	DXR3	90	4.826	4.463	1.08134	polished rock slab
Great Bank of Guizhou	DXR3	91	3.991	3.214	1.24175	polished rock slab
Great Bank of Guizhou	DXR3	92	2.45	1.87	1.31016	polished rock slab
Great Bank of Guizhou	DXR3	93	4.771	4.086	1.16765	polished rock slab
Great Bank of Guizhou	DXR3	94	5.637	5.234	1.077	polished rock slab
Great Bank of Guizhou	DXR3	95	5.955	5.126	1.16172	polished rock slab
Great Bank of Guizhou	DXR3	96	5.684	5.222	1.08847	polished rock slab
Great Bank of Guizhou	DXR3	97	6.408	5.987	1.07032	polished rock slab
Great Bank of Guizhou	DXR3	98	5.011	3.268	1.53335	polished rock slab
Great Bank of Guizhou	DXR3	99	6.011	5.371	1.11916	polished rock slab
Great Bank of Guizhou	DXR3	100	7.777	6.801	1.14351	polished rock slab
Great Bank of Guizhou	DXR3	101	2.665	2.208	1.20697	polished rock slab
Great Bank of Guizhou	DXR3	102	4.147	3.39	1.2233	polished rock slab
Great Bank of Guizhou	DXR3	103	4.781	4.735	1.00971	polished rock slab
Great Bank of Guizhou	DXR3	104	7.749	6.477	1.19639	polished rock slab
Great Bank of Guizhou	DXR3	105	5.845	5.162	1.13231	polished rock slab
Great Bank of Guizhou	DXR3	106	8.51	7.844	1.08491	polished rock slab
Great Bank of Guizhou	DXR3	107	4.37	4.059	1.07662	polished rock slab
Great Bank of Guizhou	DXR3	108	6.528	5.833	1.11915	polished rock slab
Great Bank of Guizhou	DXR3	109	2.87	2.494	1.15076	polished rock slab
Great Bank of Guizhou	DXR3	110	2.146	1.671	1.28426	polished rock slab
Great Bank of Guizhou	DXR3	111	2.225	1.748	1.27288	polished rock slab
Great Bank of Guizhou	DXR3	112	3.386	2.653	1.27629	polished rock slab
Great Bank of Guizhou	DXR3	113	3.374	3.073	1.09795	polished rock slab
Great Bank of Guizhou	DXR3	114	8.125	7.815	1.03967	polished rock slab
Great Bank of Guizhou	DXR3	115	3.07	2.92	1.05137	polished rock slab
Great Bank of Guizhou	DXR3	116	5.214	4.379	1.19068	polished rock slab
Great Bank of Guizhou	DXR3	117	2.976	2.59	1.14903	polished rock slab
Great Bank of Guizhou	DXR3	118	5.387	3.531	1.52563	polished rock slab
Great Bank of Guizhou	DXR3	119	4.807	4.382	1.09699	polished rock slab
Great Bank of Guizhou	DXR3	120	3.452	2.859	1.20742	polished rock slab
Great Bank of Guizhou	DXR3	121	2.511	1.966	1.27721	polished rock slab
Great Bank of Guizhou	DXR3	122	5.314	4.211	1.26193	polished rock slab
Great Bank of Guizhou	DXR3	123	3.698	2.83	1.30671	polished rock slab
Great Bank of Guizhou	DXR3	124	5.283	4.767	1.10824	polished rock slab
Great Bank of Guizhou	DXR3	125	4.397	3.846	1.14327	polished rock slab
Great Bank of Guizhou	DXR3	126	4.382	3.501	1.25164	polished rock slab
Great Bank of Guizhou	DXR3	127	4.532	4.215	1.07521	polished rock slab
Great Bank of Guizhou	DXR3	128	3.506	3.23	1.08545	polished rock slab
Great Bank of Guizhou	DXR3	129	7.088	5.406	1.31114	polished rock slab
Great Bank of Guizhou	DXR3	130	5.956	5.333	1.11682	polished rock slab
Great Bank of Guizhou	DXR3	131	5.543	5.387	1.02896	polished rock slab
Great Bank of Guizhou	DXR3	132	5.84	5.184	1.12654	polished rock slab
Great Bank of Guizhou	DXR3	133	2.676	2.269	1.17937	polished rock slab
Great Bank of Guizhou	DXR3	134	3.671	2.847	1.28943	polished rock slab
Great Bank of Guizhou	DXR3	135	3.335	2.146	1.55405	polished rock slab
Great Bank of Guizhou	DXR3	136	3.518	2.907	1.21018	polished rock slab
Great Bank of Guizhou	DXR3	137	5.339	4.798	1.11276	polished rock slab
Great Bank of Guizhou	DXR3	138	4.46	3.572	1.2486	polished rock slab
Great Bank of Guizhou	DXR3	139	5.569	4.486	1.24142	polished rock slab
Great Bank of Guizhou	DXR3	140	5.102	4.764	1.07095	polished rock slab
Great Bank of Guizhou	DXR3	141	5.682	3.011	1.88708	polished rock slab
Great Bank of Guizhou	DXR3	142	5.912	4.097	1.44301	polished rock slab
Great Bank of Guizhou	DXR3	143	3.35	2.587	1.29494	polished rock slab
Great Bank of Guizhou	DXR3	144	3.418	2.878	1.18763	polished rock slab
Great Bank of Guizhou	DXR3	145	7.74	4.896	1.58088	polished rock slab
Great Bank of Guizhou	DXR3	146	3.933	2.417	1.62722	polished rock slab
Great Bank of Guizhou	DXR3	147	4.091	3.023	1.35329	polished rock slab
Great Bank of Guizhou	DXR3	148	6.628	6.032	1.09881	polished rock slab
Great Bank of Guizhou	DXR3	149	3.227	3.034	1.06361	polished rock slab
Great Bank of Guizhou	DXR3	150	5.51	3.2	1.72187	polished rock slab
Great Bank of Guizhou	DXR3	151	3.484	3.178	1.09629	polished rock slab
Great Bank of Guizhou	DXR3	152	5.265	3.43	1.53499	polished rock slab
Great Bank of Guizhou	DXR3	153	6.881	5.547	1.24049	polished rock slab
Great Bank of Guizhou	DXR3	154	3.354	2.402	1.39634	polished rock slab
Great Bank of Guizhou	DXR3	155	3.944	2.87	1.37422	polished rock slab
Great Bank of Guizhou	DXR3	156	8.083	7.66	1.05522	polished rock slab
Great Bank of Guizhou	DXR3	157	3.919	3.083	1.27116	polished rock slab
Great Bank of Guizhou	DXR-8	1	2.723	1.837	1.48231	polished rock slab
Great Bank of Guizhou	DXR-8	2	2.4	2.259	1.06242	polished rock slab
Great Bank of Guizhou	DXR-8	3	2.515	1.897	1.32578	polished rock slab
Great Bank of Guizhou	DXR-8	4	1.475	0.804	1.83458	polished rock slab
Great Bank of Guizhou	DXR-8	5	4.808	3.503	1.37254	polished rock slab
Great Bank of Guizhou	DXR-8	6	2.22	1.732	1.28176	polished rock slab
Great Bank of Guizhou	DXR-8	7	2.312	1.604	1.4414	polished rock slab
Great Bank of Guizhou	DXR-8	8	1.694	1.616	1.04827	polished rock slab
Great Bank of Guizhou	DXR-8	9	3.296	3.159	1.04337	polished rock slab
Great Bank of Guizhou	DXR-8	10	3.401	2.88	1.1809	polished rock slab
Great Bank of Guizhou	DXR-8	11	3.053	2.007	1.52118	polished rock slab
Great Bank of Guizhou	DXR-8	12	3.459	2.421	1.42875	polished rock slab
Great Bank of Guizhou	DXR-8	13	3.307	2.752	1.20167	polished rock slab
Great Bank of Guizhou	DXR-8	14	2.955	2.487	1.18818	polished rock slab
Great Bank of Guizhou	DXR-8	15	3.754	2.195	1.71025	polished rock slab
Great Bank of Guizhou	DXR-8	16	4.978	4.172	1.19319	polished rock slab
Great Bank of Guizhou	DXR-8	17	3.631	2.265	1.60309	polished rock slab
Great Bank of Guizhou	DXR-8	18	3.296	2.739	1.20336	polished rock slab
Great Bank of Guizhou	DXR-8	19	5.453	4.614	1.18184	polished rock slab
Great Bank of Guizhou	DXR-8	20	4.137	3.597	1.15013	polished rock slab
Great Bank of Guizhou	DXR-8	21	4.063	3.433	1.18351	polished rock slab
Great Bank of Guizhou	DXR-8	22	3.796	3.152	1.20431	polished rock slab
Great Bank of Guizhou	DXR-8	23	3.699	3.264	1.13327	polished rock slab
Great Bank of Guizhou	DXR-8	24	3.963	3.748	1.05736	polished rock slab
Great Bank of Guizhou	DXR-8	25	3.563	3.264	1.09161	polished rock slab
Great Bank of Guizhou	DXR-8	26	3.002	2.915	1.02985	polished rock slab
Great Bank of Guizhou	DXR-8	27	4.895	4.364	1.12168	polished rock slab
Great Bank of Guizhou	DXR-8	28	2.566	2.199	1.16689	polished rock slab
Great Bank of Guizhou	DXR-8	29	4.648	2.878	1.61501	polished rock slab
Great Bank of Guizhou	DXR-8	30	3.134	2.224	1.40917	polished rock slab
Great Bank of Guizhou	DXR-8	31	4.823	3.163	1.52482	polished rock slab
Great Bank of Guizhou	DXR-8	32	3.726	3.247	1.14752	polished rock slab
Great Bank of Guizhou	DXR-8	33	4.382	4.137	1.05922	polished rock slab
Great Bank of Guizhou	DXR-8	34	5.065	4.248	1.19233	polished rock slab
Great Bank of Guizhou	DXR-8	35	3.865	3.201	1.20744	polished rock slab
Great Bank of Guizhou	DXR-8	36	4.284	2.338	1.83234	polished rock slab
Great Bank of Guizhou	DXR-8	37	4.238	3.659	1.15824	polished rock slab
Great Bank of Guizhou	DXR-8	38	3.462	2.642	1.31037	polished rock slab
Great Bank of Guizhou	DXR-8	39	5.327	4.022	1.32447	polished rock slab
Great Bank of Guizhou	DXR-8	40	5.607	3.28	1.70945	polished rock slab
Great Bank of Guizhou	DXR-8	41	4.24	3.562	1.19034	polished rock slab
Great Bank of Guizhou	DXR-8	42	4.619	3.777	1.22293	polished rock slab
Great Bank of Guizhou	DXR-8	43	4.82	4.053	1.18924	polished rock slab
Great Bank of Guizhou	DXR-8	44	5.023	2.714	1.85077	polished rock slab
Great Bank of Guizhou	DXR-8	45	3.038	2.419	1.25589	polished rock slab
Great Bank of Guizhou	DXR-8	46	3.958	1.394	2.83931	polished rock slab
Great Bank of Guizhou	DXR-8	47	2.998	2.129	1.40817	polished rock slab
Great Bank of Guizhou	DXR-8	48	5.144	3.082	1.66905	polished rock slab
Great Bank of Guizhou	DXR-8	49	4.177	3.143	1.32899	polished rock slab
Great Bank of Guizhou	DXR-8	50	4.516	3.458	1.30596	polished rock slab
Great Bank of Guizhou	DXR-8	51	2.103	1.553	1.35415	polished rock slab
Great Bank of Guizhou	DXR-8	52	4.06	3.399	1.19447	polished rock slab
Great Bank of Guizhou	DXR-8	53	3.848	3.244	1.18619	polished rock slab
Great Bank of Guizhou	DXR-8	54	6.766	4.688	1.44326	polished rock slab
Great Bank of Guizhou	DXR-8	55	4.287	3.188	1.34473	polished rock slab
Great Bank of Guizhou	DXR-8	56	4.378	3.068	1.42699	polished rock slab
Great Bank of Guizhou	DXR-8	57	4.36	1.651	2.64082	polished rock slab
Great Bank of Guizhou	DXR-8	58	3.165	2.827	1.11956	polished rock slab
Great Bank of Guizhou	DXR-8	59	5.358	4.893	1.09503	polished rock slab
Great Bank of Guizhou	DXR-8	60	2.61	1.556	1.67738	polished rock slab
Great Bank of Guizhou	DXR-8	61	3.902	3.322	1.17459	polished rock slab
Great Bank of Guizhou	DXR-8	62	5.144	4.347	1.18334	polished rock slab
Great Bank of Guizhou	DXR-8	63	2.107	1.958	1.0761	polished rock slab
Great Bank of Guizhou	DXR-8	64	3.596	2.661	1.35137	polished rock slab
Great Bank of Guizhou	DXR-8	65	4.325	4.092	1.05694	polished rock slab
Great Bank of Guizhou	DXR-8	66	7.024	6.471	1.08546	polished rock slab
Great Bank of Guizhou	DXR-8	67	3.812	3.419	1.11495	polished rock slab
Great Bank of Guizhou	DXR-8	68	3.573	2.773	1.2885	polished rock slab
Great Bank of Guizhou	DXR-8	69	4.169	3.337	1.24933	polished rock slab
Great Bank of Guizhou	DXR-8	70	4.1	3.185	1.28728	polished rock slab
Great Bank of Guizhou	DXR-8	71	4.484	4.319	1.0382	polished rock slab
Great Bank of Guizhou	DXR-8	72	3.812	3.3	1.15515	polished rock slab
Great Bank of Guizhou	DXR-8	73	4.726	4.56	1.0364	polished rock slab
Great Bank of Guizhou	DXR-8	74	2.97	0.934	3.17987	polished rock slab
Great Bank of Guizhou	DXR-8	75	3.702	3.667	1.00954	polished rock slab
Great Bank of Guizhou	DXR-8	76	2.418	2.035	1.18821	polished rock slab
Great Bank of Guizhou	DXR-8	77	3.165	2.892	1.0944	polished rock slab
Great Bank of Guizhou	DXR-8	78	3.938	1.563	2.51951	polished rock slab
Great Bank of Guizhou	DXR-8	79	3.708	3.133	1.18353	polished rock slab
Great Bank of Guizhou	DXR-8	80	3.062	2.602	1.17679	polished rock slab
Great Bank of Guizhou	DXR-8	81	3.184	2.666	1.1943	polished rock slab
Great Bank of Guizhou	DXR-8	82	3.495	2.837	1.23194	polished rock slab
Great Bank of Guizhou	DXR-8	83	2.436	1.958	1.24413	polished rock slab
Great Bank of Guizhou	DXR-8	84	2.087	2.037	1.02455	polished rock slab
Great Bank of Guizhou	DXR-8	85	3.548	2.523	1.40626	polished rock slab
Great Bank of Guizhou	DXR-8	86	3.097	1.552	1.99549	polished rock slab
Great Bank of Guizhou	DXR-8	87	3.425	2.767	1.2378	polished rock slab
Great Bank of Guizhou	DXR-8	88	3.484	2.525	1.3798	polished rock slab
Great Bank of Guizhou	DXR-8	89	3.949	3.415	1.15637	polished rock slab
Great Bank of Guizhou	DXR-8	90	3.242	2.451	1.32273	polished rock slab
Great Bank of Guizhou	DXR-8	91	2.527	1.581	1.59836	polished rock slab
Great Bank of Guizhou	DXR-8	92	6.296	5.543	1.13585	polished rock slab
Great Bank of Guizhou	DXR-8	93	3.919	3.203	1.22354	polished rock slab
Great Bank of Guizhou	DXR-8	94	3.715	2.863	1.29759	polished rock slab
Great Bank of Guizhou	DXR-8	95	2.626	2.055	1.27786	polished rock slab
Great Bank of Guizhou	DXR-8	96	7.911	4.609	1.71642	polished rock slab
Great Bank of Guizhou	DXR-8	97	4.02	3.579	1.12322	polished rock slab
Great Bank of Guizhou	DXR-8	98	4.248	3.736	1.13704	polished rock slab
Great Bank of Guizhou	DXR-8	99	3.195	3.048	1.04823	polished rock slab
Great Bank of Guizhou	DXR-8	100	2.726	2.416	1.12831	polished rock slab
Great Bank of Guizhou	DXR-8	101	4.589	4.402	1.04248	polished rock slab
Great Bank of Guizhou	DXR-8	102	4.081	3.21	1.27134	polished rock slab
Great Bank of Guizhou	DXR-8	103	6.245	5.778	1.08082	polished rock slab
Great Bank of Guizhou	DXR-8	104	2.365	2.02	1.17079	polished rock slab
Great Bank of Guizhou	DXR-8	105	3.876	2.888	1.34211	polished rock slab
Great Bank of Guizhou	DXR-8	106	4.465	4.229	1.05581	polished rock slab
Great Bank of Guizhou	DXR-8	107	4.191	3.082	1.35983	polished rock slab
Great Bank of Guizhou	DXR-8	108	4.219	3.629	1.16258	polished rock slab
Great Bank of Guizhou	DXR-8	109	3.185	2.524	1.26189	polished rock slab
Great Bank of Guizhou	DXR-8	110	6.172	5.035	1.22582	polished rock slab
Great Bank of Guizhou	DXR-8	111	4.323	3.301	1.3096	polished rock slab
Great Bank of Guizhou	DXR-8	112	4.252	4.043	1.05169	polished rock slab
Great Bank of Guizhou	DXR-8	113	2.707	2.388	1.13358	polished rock slab
Great Bank of Guizhou	DXR-8	114	3.146	2.429	1.29518	polished rock slab
Great Bank of Guizhou	DXR-8	115	2.501	1.944	1.28652	polished rock slab
Great Bank of Guizhou	DXR-8	116	3.112	1.634	1.90453	polished rock slab
Great Bank of Guizhou	DXR-8	117	4.303	2.737	1.57216	polished rock slab
Great Bank of Guizhou	DXR-8	118	4.406	4.097	1.07542	polished rock slab
Great Bank of Guizhou	DXR-8	119	4.524	3.781	1.19651	polished rock slab
Great Bank of Guizhou	DXR-8	120	2.432	2.266	1.07326	polished rock slab
Great Bank of Guizhou	DXR-8	121	3.645	3.114	1.17052	polished rock slab
Great Bank of Guizhou	DXR-8	122	3.965	2.838	1.39711	polished rock slab
Great Bank of Guizhou	DXR-8	123	4.851	2.424	2.00124	polished rock slab
Great Bank of Guizhou	DXR-8	124	4.391	3.244	1.35358	polished rock slab
Great Bank of Guizhou	DXR-8	125	5.137	4.723	1.08766	polished rock slab
Great Bank of Guizhou	DXR-8	126	5.245	3.704	1.41604	polished rock slab
Great Bank of Guizhou	DXR-8	127	4.317	3.297	1.30937	polished rock slab
Great Bank of Guizhou	DXR-8	1	4.769	4.448	1.07217	polished rock slab
Great Bank of Guizhou	DXR-8	2	3.71	3.272	1.13386	polished rock slab
Great Bank of Guizhou	DXR-8	3	2.379	1.862	1.27766	polished rock slab
Great Bank of Guizhou	DXR-8	4	4.352	4.343	1.00207	polished rock slab
Great Bank of Guizhou	DXR-8	5	5.486	3.963	1.3843	polished rock slab
Great Bank of Guizhou	DXR-8	6	5.115	4.498	1.13717	polished rock slab
Great Bank of Guizhou	DXR-8	7	3.718	2.801	1.32738	polished rock slab
Great Bank of Guizhou	DXR-8	8	4.795	2.597	1.84636	polished rock slab
Great Bank of Guizhou	DXR-8	9	4.003	2.539	1.5766	polished rock slab
Great Bank of Guizhou	DXR-8	10	3.375	2.926	1.15345	polished rock slab
Great Bank of Guizhou	DXR-8	11	3.778	2.489	1.51788	polished rock slab
Great Bank of Guizhou	DXR-8	12	4.876	4.637	1.05154	polished rock slab
Great Bank of Guizhou	DXR-8	13	3.9	2.47	1.57895	polished rock slab
Great Bank of Guizhou	DXR-8	14	4.005	2.79	1.43548	polished rock slab
Great Bank of Guizhou	DXR-8	15	2.526	2.125	1.18871	polished rock slab
Great Bank of Guizhou	DXR-8	16	4.369	3.139	1.39184	polished rock slab
Great Bank of Guizhou	DXR-8	17	5.028	3.022	1.6638	polished rock slab
Great Bank of Guizhou	DXR-8	18	3.755	3.366	1.11557	polished rock slab
Great Bank of Guizhou	DXR-8	19	1.944	1.785	1.08908	polished rock slab
Great Bank of Guizhou	DXR-8	20	3.972	3.688	1.07701	polished rock slab
Great Bank of Guizhou	DXR-8	21	4.292	3.961	1.08356	polished rock slab
Great Bank of Guizhou	DXR-8	22	3.605	3.489	1.03325	polished rock slab
Great Bank of Guizhou	DXR-8	23	3.667	3.241	1.13144	polished rock slab
Great Bank of Guizhou	DXR-8	24	3.1	2.634	1.17692	polished rock slab
Great Bank of Guizhou	DXR-8	25	4.471	4.129	1.08283	polished rock slab
Great Bank of Guizhou	DXR-8	26	3.103	2.849	1.08915	polished rock slab
Great Bank of Guizhou	DXR-8	27	3.303	2.618	1.26165	polished rock slab
Great Bank of Guizhou	DXR-8	28	4.181	3.421	1.22216	polished rock slab
Great Bank of Guizhou	DXR-8	29	4.743	3.546	1.33756	polished rock slab
Great Bank of Guizhou	DXR-8	30	3.895	3.287	1.18497	polished rock slab
Great Bank of Guizhou	DXR-8	31	3.53	3.369	1.04779	polished rock slab
Great Bank of Guizhou	DXR-8	32	5.522	4.562	1.21043	polished rock slab
Great Bank of Guizhou	DXR-8	33	4.477	3.467	1.29132	polished rock slab
Great Bank of Guizhou	DXR-8	34	3.249	2.777	1.16997	polished rock slab
Great Bank of Guizhou	DXR-8	35	3.054	2.736	1.11623	polished rock slab
Great Bank of Guizhou	DXR-8	36	2.658	2.373	1.1201	polished rock slab
Great Bank of Guizhou	DXR-8	37	3.74	3.362	1.11243	polished rock slab
Great Bank of Guizhou	DXR-8	38	3.958	3.563	1.11086	polished rock slab
Great Bank of Guizhou	DXR-8	39	3.946	2.957	1.33446	polished rock slab
Great Bank of Guizhou	DXR-8	40	4.949	3.435	1.44076	polished rock slab
Great Bank of Guizhou	DXR-8	41	3.755	3.349	1.12123	polished rock slab
Great Bank of Guizhou	DXR-8	42	3.654	3.465	1.05455	polished rock slab
Great Bank of Guizhou	DXR-8	43	3.977	2.893	1.3747	polished rock slab
Great Bank of Guizhou	DXR-8	44	4.9	4.215	1.16251	polished rock slab
Great Bank of Guizhou	DXR-8	45	4.011	3.117	1.28681	polished rock slab
Great Bank of Guizhou	DXR-8	46	4.797	3.127	1.53406	polished rock slab
Great Bank of Guizhou	DXR-8	47	4.249	3.402	1.24897	polished rock slab
Great Bank of Guizhou	DXR-8	48	3.704	3.64	1.01758	polished rock slab
Great Bank of Guizhou	DXR-8	49	5.461	4.041	1.3514	polished rock slab
Great Bank of Guizhou	DXR-8	50	4.125	3.035	1.35914	polished rock slab
Great Bank of Guizhou	DXR-8	51	4.463	3.687	1.21047	polished rock slab
Great Bank of Guizhou	DXR-8	52	3.769	3.726	1.01154	polished rock slab
Great Bank of Guizhou	DXR-8	53	3.763	3.598	1.04586	polished rock slab
Great Bank of Guizhou	DXR-8	54	4.794	2.53	1.89486	polished rock slab
Great Bank of Guizhou	DXR-8	55	2.875	2.62	1.09733	polished rock slab
Great Bank of Guizhou	DXR-8	56	2.845	2.51	1.13347	polished rock slab
Great Bank of Guizhou	DXR-8	57	3.036	2.219	1.36818	polished rock slab
Great Bank of Guizhou	DXR-8	58	2.83	2.217	1.2765	polished rock slab
Great Bank of Guizhou	DXR-8	59	3.852	3.03	1.27129	polished rock slab
Great Bank of Guizhou	DXR-8	60	4.771	4.048	1.17861	polished rock slab
Great Bank of Guizhou	DXR-8	61	4.7	4.392	1.07013	polished rock slab
Great Bank of Guizhou	DXR-8	62	3.883	3.82	1.01649	polished rock slab
Great Bank of Guizhou	DXR-8	63	3.368	2.85	1.18175	polished rock slab
Great Bank of Guizhou	DXR-8	64	3.318	2.951	1.12436	polished rock slab
Great Bank of Guizhou	DXR-8	65	4.033	2.895	1.39309	polished rock slab
Great Bank of Guizhou	DXR-8	66	4.459	2.526	1.76524	polished rock slab
Great Bank of Guizhou	DXR-8	67	4.627	2.74	1.68869	polished rock slab
Great Bank of Guizhou	DXR-8	68	5.07	4.517	1.12243	polished rock slab
Great Bank of Guizhou	DXR-8	69	4.3	3.351	1.2832	polished rock slab
Great Bank of Guizhou	DXR-8	70	4.219	2.356	1.79075	polished rock slab
Great Bank of Guizhou	DXR-8	71	4.762	4.249	1.12073	polished rock slab
Great Bank of Guizhou	DXR-8	72	2.901	2.877	1.00834	polished rock slab
Great Bank of Guizhou	DXR-8	73	3.969	3.558	1.11551	polished rock slab
Great Bank of Guizhou	DXR-8	74	4.397	4.202	1.04641	polished rock slab
Great Bank of Guizhou	DXR-8	75	5.767	2.462	2.3424	polished rock slab
Great Bank of Guizhou	DXR-8	76	4.35	3.583	1.21407	polished rock slab
Great Bank of Guizhou	DXR-8	77	3.864	3.656	1.05689	polished rock slab
Great Bank of Guizhou	DXR-8	78	5.244	4.308	1.21727	polished rock slab
Great Bank of Guizhou	DXR-8	79	2.911	2.403	1.2114	polished rock slab
Great Bank of Guizhou	DXR-8	80	5.437	3.996	1.36061	polished rock slab
Great Bank of Guizhou	DXR-8	81	5.796	5.045	1.14886	polished rock slab
Great Bank of Guizhou	DXR-8	82	4.127	4	1.03175	polished rock slab
Great Bank of Guizhou	DXR-8	83	5.527	4.115	1.34313	polished rock slab
Great Bank of Guizhou	DXR-8	84	5.459	3.929	1.38941	polished rock slab
Great Bank of Guizhou	DXR-8	85	3.877	2.43	1.59547	polished rock slab
Great Bank of Guizhou	DXR-8	86	4.95	4.637	1.0675	polished rock slab
Great Bank of Guizhou	DXR-8	87	2.854	2.588	1.10278	polished rock slab
Great Bank of Guizhou	DXR-8	88	4.517	3.763	1.20037	polished rock slab
Great Bank of Guizhou	DXR-8	89	5.027	3.552	1.41526	polished rock slab
Great Bank of Guizhou	DXR-8	90	3.259	2.65	1.22981	polished rock slab
Great Bank of Guizhou	DXR-8	91	3.722	3.395	1.09632	polished rock slab
Great Bank of Guizhou	DXR-8	92	4.158	3.592	1.15757	polished rock slab
Great Bank of Guizhou	DXR-8	93	3.151	2.76	1.14167	polished rock slab
Great Bank of Guizhou	DXR-8	94	4.576	3.618	1.26479	polished rock slab
Great Bank of Guizhou	DXR-8	95	3.458	3.4	1.01706	polished rock slab
Great Bank of Guizhou	DXR-8	96	3.025	2.469	1.22519	polished rock slab
Great Bank of Guizhou	DXR-8	97	3.66	3.627	1.0091	polished rock slab
Great Bank of Guizhou	DXR-8	98	2.64	2.333	1.13159	polished rock slab
Great Bank of Guizhou	DXR-8	99	3.048	2.75	1.10836	polished rock slab
Great Bank of Guizhou	DXR-8	100	4.048	3.204	1.26342	polished rock slab
Great Bank of Guizhou	DXR-8	101	2.562	2.27	1.12863	polished rock slab
Great Bank of Guizhou	DXR-8	102	4.198	3.67	1.14387	polished rock slab
Great Bank of Guizhou	DXR-8	103	3.403	3.359	1.0131	polished rock slab
Great Bank of Guizhou	DXR-8	104	4.419	3.512	1.25826	polished rock slab
Great Bank of Guizhou	DXR-8	105	5.266	3.751	1.40389	polished rock slab
Great Bank of Guizhou	DXR-8	106	5.544	4.389	1.26316	polished rock slab
Great Bank of Guizhou	DXR-8	107	2.816	2.559	1.10043	polished rock slab
Great Bank of Guizhou	DXR-8	108	2.662	2.614	1.01836	polished rock slab
Great Bank of Guizhou	DXR-8	109	5.291	4.198	1.26036	polished rock slab
Great Bank of Guizhou	DXR-8	110	3.723	3.488	1.06737	polished rock slab
Great Bank of Guizhou	DXR-8	111	4.54	3.807	1.19254	polished rock slab
Great Bank of Guizhou	DXR-8	112	4.751	4.57	1.03961	polished rock slab
Great Bank of Guizhou	DXR-8	113	4.091	3.279	1.24764	polished rock slab
Great Bank of Guizhou	DXR-8	114	3.785	3.784	1.00026	polished rock slab
Great Bank of Guizhou	DXR-8	115	3.916	2.657	1.47384	polished rock slab
Great Bank of Guizhou	DXR-8	116	3.342	2.971	1.12487	polished rock slab
Great Bank of Guizhou	DXR-8	117	2.831	2.64	1.07235	polished rock slab
Great Bank of Guizhou	DXR-8	118	6.125	5.852	1.04665	polished rock slab
Great Bank of Guizhou	DXR-8	119	3.305	2.94	1.12415	polished rock slab
Great Bank of Guizhou	DXR-8	120	4.639	4.183	1.10901	polished rock slab
Great Bank of Guizhou	DXR-8	121	3.699	2.442	1.51474	polished rock slab
Great Bank of Guizhou	DXR-8	122	4.587	4.024	1.13991	polished rock slab
Great Bank of Guizhou	DXR-8	123	6.025	4.514	1.33474	polished rock slab
Great Bank of Guizhou	DXR-8	124	3.959	3.128	1.26566	polished rock slab
Great Bank of Guizhou	DXR-8	125	3.176	3.088	1.0285	polished rock slab
Great Bank of Guizhou	DXR-8	126	3.515	3.171	1.10848	polished rock slab
Great Bank of Guizhou	DXR-8	127	4.57	4.169	1.09619	polished rock slab
Great Bank of Guizhou	DXR-8	128	5.516	3.781	1.45887	polished rock slab
Great Bank of Guizhou	DXR-8	129	4.169	3.403	1.2251	polished rock slab
Great Bank of Guizhou	DXR-8	130	4.83	4.635	1.04207	polished rock slab
Great Bank of Guizhou	DXR-8	131	4.408	3.326	1.32532	polished rock slab
Great Bank of Guizhou	DXR-8	132	3.832	3.181	1.20465	polished rock slab
Great Bank of Guizhou	DXR-8	133	3.691	3.114	1.18529	polished rock slab
Great Bank of Guizhou	DXR-8	134	4.217	3.902	1.08073	polished rock slab
Great Bank of Guizhou	DXR-8	135	5.307	3.694	1.43665	polished rock slab
Great Bank of Guizhou	DXR-8	136	3.934	3.582	1.09827	polished rock slab
Great Bank of Guizhou	DXR-8	137	2.738	2.705	1.0122	polished rock slab
Great Bank of Guizhou	DXR-8	138	5.483	4.546	1.20612	polished rock slab
Great Bank of Guizhou	DXR-8	139	4.759	2.398	1.98457	polished rock slab
Great Bank of Guizhou	DXR-8	140	4.053	2.62	1.54695	polished rock slab
Great Bank of Guizhou	DXR-8	141	2.992	2.353	1.27157	polished rock slab
Great Bank of Guizhou	DXR-8	142	4.523	4.291	1.05407	polished rock slab
Great Bank of Guizhou	DXR-8	143	3.769	2.897	1.301	polished rock slab
Great Bank of Guizhou	DXR-8	144	5.492	4.047	1.35705	polished rock slab
Great Bank of Guizhou	DXR-8	145	4.121	3.912	1.05343	polished rock slab
Great Bank of Guizhou	DXR-8	146	4.798	3.382	1.41869	polished rock slab
Great Bank of Guizhou	DXR-8	147	3.839	2.999	1.28009	polished rock slab
Great Bank of Guizhou	DXR-8	148	5.126	4.008	1.27894	polished rock slab
Great Bank of Guizhou	DXR-8	149	3.355	2.592	1.29437	polished rock slab
Great Bank of Guizhou	DXR-8	150	6.07	5.219	1.16306	polished rock slab
Great Bank of Guizhou	DXR-8	151	2.734	2.439	1.12095	polished rock slab
Great Bank of Guizhou	DXR-8	152	4.986	4.512	1.10505	polished rock slab
Great Bank of Guizhou	DXR-8	153	4.39	4.359	1.00711	polished rock slab
Chongzuo-Pingguo Platform	PG-34	1	2.495	2.119	1.17744	polished rock slab	23.554166 N, 107.379167 E
Chongzuo-Pingguo Platform	PG-34	2	1.691	1.596	1.05952	polished rock slab
Chongzuo-Pingguo Platform	PG-34	3	1.618	1.549	1.04454	polished rock slab
Chongzuo-Pingguo Platform	PG-34	4	3.063	2.739	1.11829	polished rock slab
Chongzuo-Pingguo Platform	PG-34	5	2.029	1.925	1.05403	polished rock slab
Chongzuo-Pingguo Platform	PG-34	6	3.25	2.543	1.27802	polished rock slab
Chongzuo-Pingguo Platform	PG-34	7	3.39	3.086	1.09851	polished rock slab
Chongzuo-Pingguo Platform	PG-34	8	2.21	2.079	1.06301	polished rock slab
Chongzuo-Pingguo Platform	PG-34	9	1.995	1.91	1.0445	polished rock slab
Chongzuo-Pingguo Platform	PG-34	10	3.29	2.48	1.32661	polished rock slab
Chongzuo-Pingguo Platform	PG-34	11	3.84	3.229	1.18922	polished rock slab
Chongzuo-Pingguo Platform	PG-34	12	3.778	3.089	1.22305	polished rock slab
Chongzuo-Pingguo Platform	PG-34	13	3.095	3.026	1.0228	polished rock slab
Chongzuo-Pingguo Platform	PG-34	14	3.038	2.672	1.13698	polished rock slab
Chongzuo-Pingguo Platform	PG-34	15	1.831	1.681	1.08923	polished rock slab
Chongzuo-Pingguo Platform	PG-34	16	1.752	1.155	1.51688	polished rock slab
Chongzuo-Pingguo Platform	PG-34	17	2.427	2.416	1.00455	polished rock slab
Chongzuo-Pingguo Platform	PG-34	18	1.82	1.771	1.02767	polished rock slab
Chongzuo-Pingguo Platform	PG-34	19	3.223	2.765	1.16564	polished rock slab
Chongzuo-Pingguo Platform	PG-34	20	2.565	2.365	1.08457	polished rock slab
Chongzuo-Pingguo Platform	PG-34	21	2.027	1.487	1.36315	polished rock slab
Chongzuo-Pingguo Platform	PG-34	22	2.51	2.384	1.05285	polished rock slab
Chongzuo-Pingguo Platform	PG-34	23	1.7	1.569	1.08349	polished rock slab
Chongzuo-Pingguo Platform	PG-34	24	1.54	1.288	1.19565	polished rock slab
Chongzuo-Pingguo Platform	PG-34	25	2.007	1.867	1.07499	polished rock slab
Chongzuo-Pingguo Platform	PG-34	26	2	1.921	1.04112	polished rock slab
Chongzuo-Pingguo Platform	PG-34	27	2.964	2.958	1.00203	polished rock slab
Chongzuo-Pingguo Platform	PG-34	28	2.306	2.014	1.14499	polished rock slab
Chongzuo-Pingguo Platform	PG-34	29	3.404	2.497	1.36324	polished rock slab
Chongzuo-Pingguo Platform	PG-34	30	2.522	2.103	1.19924	polished rock slab
Chongzuo-Pingguo Platform	PG-34	31	2.69	2.486	1.08206	polished rock slab
Chongzuo-Pingguo Platform	PG-34	32	2.352	2.158	1.0899	polished rock slab
Chongzuo-Pingguo Platform	PG-34	33	1.994	1.745	1.14269	polished rock slab
Chongzuo-Pingguo Platform	PG-34	34	1.428	1.276	1.11912	polished rock slab
Chongzuo-Pingguo Platform	PG-34	35	2.083	1.911	1.09001	polished rock slab
Chongzuo-Pingguo Platform	PG-34	36	1.797	1.665	1.07928	polished rock slab
Chongzuo-Pingguo Platform	PG-34	37	2.161	1.857	1.1637	polished rock slab
Chongzuo-Pingguo Platform	PG-34	38	2.359	2.029	1.16264	polished rock slab
Chongzuo-Pingguo Platform	PG-34	39	2.21	1.843	1.19913	polished rock slab
Chongzuo-Pingguo Platform	PG-34	40	1.954	1.885	1.0366	polished rock slab
Chongzuo-Pingguo Platform	PG-34	41	1.845	1.657	1.11346	polished rock slab
Chongzuo-Pingguo Platform	PG-34	42	1.902	1.707	1.11424	polished rock slab
Chongzuo-Pingguo Platform	PG-34	43	1.687	1.547	1.0905	polished rock slab
Chongzuo-Pingguo Platform	PG-34	44	1.371	1.266	1.08294	polished rock slab
Chongzuo-Pingguo Platform	PG-34	45	2.364	2.075	1.13928	polished rock slab
Chongzuo-Pingguo Platform	PG-34	46	1.223	1.193	1.02515	polished rock slab
Chongzuo-Pingguo Platform	PG-34	47	1.64	1.601	1.02436	polished rock slab
Chongzuo-Pingguo Platform	PG-34	48	3.084	2.863	1.07719	polished rock slab
Chongzuo-Pingguo Platform	PG-34	49	2.547	2.335	1.09079	polished rock slab
Chongzuo-Pingguo Platform	PG-34	50	1.678	1.341	1.2513	polished rock slab
Chongzuo-Pingguo Platform	PG-34	51	2.319	2.312	1.00303	polished rock slab
Chongzuo-Pingguo Platform	PG-34	52	2.164	1.909	1.13358	polished rock slab
Chongzuo-Pingguo Platform	PG-34	53	1.562	1.532	1.01958	polished rock slab
Chongzuo-Pingguo Platform	PG-34	54	2.172	2.01	1.0806	polished rock slab
Chongzuo-Pingguo Platform	PG-34	55	2.013	1.381	1.45764	polished rock slab
Chongzuo-Pingguo Platform	PG-34	56	2.208	2.181	1.01238	polished rock slab
Chongzuo-Pingguo Platform	PG-34	57	1.951	1.755	1.11168	polished rock slab
Chongzuo-Pingguo Platform	PG-34	58	1.181	1.059	1.1152	polished rock slab
Chongzuo-Pingguo Platform	PG-34	59	2.137	2	1.0685	polished rock slab
Chongzuo-Pingguo Platform	PG-34	60	1.57	1.499	1.04736	polished rock slab
Chongzuo-Pingguo Platform	PG-34	61	1.933	1.83	1.05628	polished rock slab
Chongzuo-Pingguo Platform	PG-34	62	0.988	0.984	1.00407	polished rock slab
Chongzuo-Pingguo Platform	PG-34	63	1.736	1.48	1.17297	polished rock slab
Chongzuo-Pingguo Platform	PG-34	64	1.455	1.448	1.00483	polished rock slab
Chongzuo-Pingguo Platform	PG-34	65	1.002	0.948	1.05696	polished rock slab
Chongzuo-Pingguo Platform	PG-34	66	0.843	0.799	1.05507	polished rock slab
Chongzuo-Pingguo Platform	PG-34	67	3.992	3.856	1.03527	polished rock slab
Chongzuo-Pingguo Platform	PG-34	68	2.764	2.574	1.07382	polished rock slab
Chongzuo-Pingguo Platform	PG-34	69	0.981	0.901	1.08879	polished rock slab
Chongzuo-Pingguo Platform	PG-34	70	1.757	1.627	1.0799	polished rock slab
Chongzuo-Pingguo Platform	PG-34	71	1.551	1.516	1.02309	polished rock slab
Chongzuo-Pingguo Platform	PG-34	72	1.551	1.347	1.15145	polished rock slab
Chongzuo-Pingguo Platform	PG-34	73	1.329	1.006	1.32107	polished rock slab
Chongzuo-Pingguo Platform	PG-34	74	1.411	1.156	1.22059	polished rock slab
Chongzuo-Pingguo Platform	PG-34	75	1.763	1.47	1.19932	polished rock slab
Chongzuo-Pingguo Platform	PG-34	76	2.204	2.022	1.09001	polished rock slab
Chongzuo-Pingguo Platform	PG-34	77	1.709	1.696	1.00767	polished rock slab
Chongzuo-Pingguo Platform	PG-34	78	1.289	1.264	1.01978	polished rock slab
Chongzuo-Pingguo Platform	PG-34	79	2.011	1.647	1.22101	polished rock slab
Chongzuo-Pingguo Platform	PG-34	80	1.731	1.318	1.31335	polished rock slab
Chongzuo-Pingguo Platform	PG-34	81	2.144	1.854	1.15642	polished rock slab
Chongzuo-Pingguo Platform	PG-34	82	1.479	1.473	1.00407	polished rock slab
Chongzuo-Pingguo Platform	PG-34	83	1.838	1.509	1.21803	polished rock slab
Chongzuo-Pingguo Platform	PG-34	84	1.408	1.2	1.17333	polished rock slab
Chongzuo-Pingguo Platform	PG-34	85	2.149	1.784	1.2046	polished rock slab
Chongzuo-Pingguo Platform	PG-34	86	2.532	2.148	1.17877	polished rock slab
Chongzuo-Pingguo Platform	PG-34	87	3.313	3.04	1.0898	polished rock slab
Chongzuo-Pingguo Platform	PG-34	88	2.79	2.358	1.18321	polished rock slab
Chongzuo-Pingguo Platform	PG-34	89	2.773	2.282	1.21516	polished rock slab
Chongzuo-Pingguo Platform	PG-34	90	1.23	1.046	1.17591	polished rock slab
Chongzuo-Pingguo Platform	PG-34	91	2.117	1.9	1.11421	polished rock slab
Chongzuo-Pingguo Platform	PG-34	92	1.69	1.479	1.14266	polished rock slab
Chongzuo-Pingguo Platform	PG-34	93	2.102	2.037	1.03191	polished rock slab
Chongzuo-Pingguo Platform	PG-34	94	2.107	1.839	1.14573	polished rock slab
Chongzuo-Pingguo Platform	PG-34	95	2.435	2.344	1.03882	polished rock slab
Chongzuo-Pingguo Platform	PG-34	96	2.817	2.464	1.14326	polished rock slab
Chongzuo-Pingguo Platform	PG-34	97	2.244	1.604	1.399	polished rock slab
Chongzuo-Pingguo Platform	PG-34	98	1.811	1.586	1.14187	polished rock slab
Chongzuo-Pingguo Platform	PG-34	99	1.502	1.374	1.09316	polished rock slab
Chongzuo-Pingguo Platform	PG-34	100	1.498	1.439	1.041	polished rock slab
Chongzuo-Pingguo Platform	PG-34	101	1.402	1.165	1.20343	polished rock slab
Chongzuo-Pingguo Platform	PG-34	102	1.328	1.141	1.16389	polished rock slab
Chongzuo-Pingguo Platform	PG-34	103	1.677	1.24	1.35242	polished rock slab
Chongzuo-Pingguo Platform	PG-34	104	1.572	1.003	1.5673	polished rock slab
Chongzuo-Pingguo Platform	PG-34	105	2.105	1.804	1.16685	polished rock slab
Chongzuo-Pingguo Platform	PG-34	106	1.779	1.62	1.09815	polished rock slab
Chongzuo-Pingguo Platform	PG-34	107	2.76	2.013	1.37109	polished rock slab
Chongzuo-Pingguo Platform	PG-34	108	2.362	1.863	1.26785	polished rock slab
Chongzuo-Pingguo Platform	PG-34	109	0.985	0.836	1.17823	polished rock slab
Chongzuo-Pingguo Platform	PG-34	110	1.977	1.367	1.44623	polished rock slab
Chongzuo-Pingguo Platform	PG-34	111	1.83	1.488	1.22984	polished rock slab
Chongzuo-Pingguo Platform	PG-34	112	2.647	2.08	1.2726	polished rock slab
Chongzuo-Pingguo Platform	PG-34	113	3.428	2.993	1.14534	polished rock slab
Chongzuo-Pingguo Platform	PG-34	114	3.131	2.488	1.25844	polished rock slab
Chongzuo-Pingguo Platform	PG-34	115	2.028	1.78	1.13933	polished rock slab
Chongzuo-Pingguo Platform	PG-34	116	2.534	2.188	1.15814	polished rock slab
Chongzuo-Pingguo Platform	PG-34	117	1.889	1.49	1.26779	polished rock slab
Chongzuo-Pingguo Platform	PG-34	118	2.774	2.149	1.29083	polished rock slab
Chongzuo-Pingguo Platform	PG-34	119	2.006	1.391	1.44213	polished rock slab
Chongzuo-Pingguo Platform	PG-34	120	1.999	1.738	1.15017	polished rock slab
Chongzuo-Pingguo Platform	PG-34	121	1.327	1.215	1.09218	polished rock slab
Chongzuo-Pingguo Platform	PG-34	122	1.403	1.378	1.01814	polished rock slab
Chongzuo-Pingguo Platform	PG-34	123	3.334	3.023	1.10288	polished rock slab
Chongzuo-Pingguo Platform	PG-34	124	2.05	1.867	1.09802	polished rock slab
Chongzuo-Pingguo Platform	PG-34	125	1.729	1.587	1.08948	polished rock slab
Chongzuo-Pingguo Platform	PG-34	126	1.578	1.465	1.07713	polished rock slab
Chongzuo-Pingguo Platform	PG-34	127	1.673	1.386	1.20707	polished rock slab
Chongzuo-Pingguo Platform	PG-34	128	1.778	1.638	1.08547	polished rock slab
Chongzuo-Pingguo Platform	PG-34	129	2.246	2.242	1.00178	polished rock slab
Chongzuo-Pingguo Platform	PG-34	130	1.938	1.773	1.09306	polished rock slab
Chongzuo-Pingguo Platform	PG-34	131	3.51	2.909	1.2066	polished rock slab
Chongzuo-Pingguo Platform	PG-34	132	1.893	1.443	1.31185	polished rock slab
Chongzuo-Pingguo Platform	PG-34	133	1.406	1.141	1.23225	polished rock slab
Chongzuo-Pingguo Platform	PG-34	134	2.656	2.498	1.06325	polished rock slab
Chongzuo-Pingguo Platform	PG-34	135	2.125	2.08	1.02163	polished rock slab
Chongzuo-Pingguo Platform	PG-34	136	1.539	1.413	1.08917	polished rock slab
Chongzuo-Pingguo Platform	PG-34	137	1.566	1.43	1.0951	polished rock slab
Chongzuo-Pingguo Platform	PG-34	138	2.333	2.089	1.1168	polished rock slab
Chongzuo-Pingguo Platform	PG-34	139	1.669	1.329	1.25583	polished rock slab
Chongzuo-Pingguo Platform	PG-34	140	2.46	2.007	1.22571	polished rock slab
Chongzuo-Pingguo Platform	PG-34	141	2.06	2.041	1.00931	polished rock slab
Chongzuo-Pingguo Platform	PG-34	142	2.345	2.183	1.07421	polished rock slab
Chongzuo-Pingguo Platform	PG-34	143	2.407	2.203	1.0926	polished rock slab
Chongzuo-Pingguo Platform	PG-34	144	2.035	1.679	1.21203	polished rock slab
Chongzuo-Pingguo Platform	PG-34	145	1.375	1.261	1.0904	polished rock slab
Chongzuo-Pingguo Platform	PG-34	146	1.94	1.763	1.1004	polished rock slab
Chongzuo-Pingguo Platform	PG-34	147	3.171	2.897	1.09458	polished rock slab
Chongzuo-Pingguo Platform	PG-34	148	1.276	1.222	1.04419	polished rock slab
Chongzuo-Pingguo Platform	PG-34	149	1.555	1.524	1.02034	polished rock slab
Chongzuo-Pingguo Platform	PG-34	150	2.504	2.135	1.17283	polished rock slab
Chongzuo-Pingguo Platform	PG-34	151	1.548	1.434	1.0795	polished rock slab
Chongzuo-Pingguo Platform	PG-34	152	1.157	0.841	1.37574	polished rock slab
Chongzuo-Pingguo Platform	PG-34	153	5.256	4.384	1.19891	polished rock slab
Chongzuo-Pingguo Platform	PG-34	154	1.383	1.151	1.20156	polished rock slab
Chongzuo-Pingguo Platform	PG-34	155	1.352	1.228	1.10098	polished rock slab
Chongzuo-Pingguo Platform	PG-34	156	3.589	3.296	1.0889	polished rock slab
Chongzuo-Pingguo Platform	PG-34	157	1.846	1.712	1.07827	polished rock slab
Chongzuo-Pingguo Platform	PG-34	158	2.197	2.155	1.01949	polished rock slab
Chongzuo-Pingguo Platform	PG-34	159	2.907	2.693	1.07947	polished rock slab
Chongzuo-Pingguo Platform	PG-34	160	3.339	2.88	1.15938	polished rock slab
Chongzuo-Pingguo Platform	PG-34	161	1.469	1.346	1.09138	polished rock slab
Chongzuo-Pingguo Platform	PG-34	162	2.666	2.327	1.14568	polished rock slab
Chongzuo-Pingguo Platform	PG-34	163	2.651	2.325	1.14022	polished rock slab
Chongzuo-Pingguo Platform	PG-34	164	1.891	1.639	1.15375	polished rock slab
Chongzuo-Pingguo Platform	PG-34	165	1.693	1.367	1.23848	polished rock slab
Chongzuo-Pingguo Platform	PG-34	166	1.71	1.544	1.10751	polished rock slab
Chongzuo-Pingguo Platform	PG-34	167	2.762	1.786	1.54647	polished rock slab
Chongzuo-Pingguo Platform	PG-34	168	2.96	2.318	1.27696	polished rock slab
Chongzuo-Pingguo Platform	PG-34	169	2.681	2.236	1.19902	polished rock slab
Chongzuo-Pingguo Platform	PG-34	170	1.266	1.259	1.00556	polished rock slab
Chongzuo-Pingguo Platform	PG-34	171	1.096	1.095	1.00091	polished rock slab
Chongzuo-Pingguo Platform	PG-34	172	1.118	1.022	1.09393	polished rock slab
Chongzuo-Pingguo Platform	PG-34	173	0.872	0.804	1.08458	polished rock slab
Chongzuo-Pingguo Platform	PG-34	174	2.329	1.837	1.26783	polished rock slab
Chongzuo-Pingguo Platform	PG-34	175	1.347	1.138	1.18366	polished rock slab
Chongzuo-Pingguo Platform	PG-34	176	2.964	2.498	1.18655	polished rock slab
Chongzuo-Pingguo Platform	PG-34	177	3.512	3.085	1.13841	polished rock slab
Chongzuo-Pingguo Platform	PG-34	178	2.777	2.463	1.12749	polished rock slab
Chongzuo-Pingguo Platform	PG-34	179	3.062	2.826	1.08351	polished rock slab
Chongzuo-Pingguo Platform	PG-34	180	1.762	1.563	1.12732	polished rock slab
Chongzuo-Pingguo Platform	PG-34	181	3.166	2.804	1.1291	polished rock slab
Chongzuo-Pingguo Platform	PG-34	182	1.383	1.237	1.11803	polished rock slab
Chongzuo-Pingguo Platform	PG-34	183	2.895	2.578	1.12296	polished rock slab
Chongzuo-Pingguo Platform	PG-34	184	3.329	2.871	1.15953	polished rock slab
Chongzuo-Pingguo Platform	PG-34	185	3.02	2.659	1.13577	polished rock slab
Chongzuo-Pingguo Platform	PG-34	186	2.471	2.074	1.19142	polished rock slab
Zhenfeng_Yangtze Platform	M1	1	1.315	0.896	1.46763	polished rock slab	25.479183 N, 105.534816 E
Zhenfeng_Yangtze Platform	M1	2	1.416	1.183	1.19696	polished rock slab
Zhenfeng_Yangtze Platform	M1	3	1.457	1.328	1.09714	polished rock slab
Zhenfeng_Yangtze Platform	M1	4	1.546	0.957	1.61546	polished rock slab
Zhenfeng_Yangtze Platform	M1	5	1.369	0.778	1.75964	polished rock slab
Zhenfeng_Yangtze Platform	M1	6	1.798	1.516	1.18602	polished rock slab
Zhenfeng_Yangtze Platform	M1	7	1.525	1.335	1.14232	polished rock slab
Zhenfeng_Yangtze Platform	M1	8	0.947	0.877	1.07982	polished rock slab
Zhenfeng_Yangtze Platform	M1	9	1.354	1.184	1.14358	polished rock slab
Zhenfeng_Yangtze Platform	M1	10	1.545	1.152	1.34115	polished rock slab
Zhenfeng_Yangtze Platform	M1	11	1.283	1.02	1.25784	polished rock slab
Zhenfeng_Yangtze Platform	M1	12	1.505	0.835	1.8024	polished rock slab
Zhenfeng_Yangtze Platform	M1	13	2.023	1.658	1.22014	polished rock slab
Zhenfeng_Yangtze Platform	M1	14	1.359	1.136	1.1963	polished rock slab
Zhenfeng_Yangtze Platform	M1	15	1.31	1.238	1.05816	polished rock slab
Zhenfeng_Yangtze Platform	M1	16	1.53	1.438	1.06398	polished rock slab
Zhenfeng_Yangtze Platform	M1	17	1.564	1.149	1.36118	polished rock slab
Zhenfeng_Yangtze Platform	M1	18	1.624	1.146	1.4171	polished rock slab
Zhenfeng_Yangtze Platform	M1	19	1.449	1.348	1.07493	polished rock slab
Zhenfeng_Yangtze Platform	M1	20	1.714	1.519	1.12837	polished rock slab
Zhenfeng_Yangtze Platform	M1	21	2.584	1.878	1.37593	polished rock slab
Zhenfeng_Yangtze Platform	M1	22	1.727	1.316	1.31231	polished rock slab
Zhenfeng_Yangtze Platform	M1	23	1.335	1.223	1.09158	polished rock slab
Zhenfeng_Yangtze Platform	M1	24	1.576	1.148	1.37282	polished rock slab
Zhenfeng_Yangtze Platform	M1	25	1.443	1.143	1.26247	polished rock slab
Zhenfeng_Yangtze Platform	M1	26	1.268	1.241	1.02176	polished rock slab
Zhenfeng_Yangtze Platform	M1	27	1.908	1.055	1.80853	polished rock slab
Zhenfeng_Yangtze Platform	M1	28	1.413	1.363	1.03668	polished rock slab
Zhenfeng_Yangtze Platform	M1	29	1.519	1.323	1.14815	polished rock slab
Zhenfeng_Yangtze Platform	M1	30	2.239	1.143	1.95888	polished rock slab
Zhenfeng_Yangtze Platform	M1	31	1.541	1.174	1.31261	polished rock slab
Zhenfeng_Yangtze Platform	M1	32	1.478	1.415	1.04452	polished rock slab
Zhenfeng_Yangtze Platform	M1	33	1.702	1.159	1.46851	polished rock slab
Zhenfeng_Yangtze Platform	M1	34	1.692	1.179	1.43511	polished rock slab
Zhenfeng_Yangtze Platform	M1	35	1.685	1.481	1.13774	polished rock slab
Zhenfeng_Yangtze Platform	M1	36	2.139	0.905	2.36354	polished rock slab
Zhenfeng_Yangtze Platform	M1	37	1.755	1.709	1.02692	polished rock slab
Zhenfeng_Yangtze Platform	M1	38	1.838	1.724	1.06613	polished rock slab
Zhenfeng_Yangtze Platform	M1	39	1.749	1.356	1.28982	polished rock slab
Zhenfeng_Yangtze Platform	M1	40	1.86	1.451	1.28187	polished rock slab
Zhenfeng_Yangtze Platform	M1	41	1.712	1.316	1.30091	polished rock slab
Zhenfeng_Yangtze Platform	M1	42	1.924	1.624	1.18473	polished rock slab
Zhenfeng_Yangtze Platform	M1	43	1.432	1.335	1.07266	polished rock slab
Zhenfeng_Yangtze Platform	M1	44	1.726	1.648	1.04733	polished rock slab
Zhenfeng_Yangtze Platform	M1	45	1.724	1.541	1.11875	polished rock slab
Zhenfeng_Yangtze Platform	M1	46	1.859	1.607	1.15681	polished rock slab
Zhenfeng_Yangtze Platform	M1	47	1.818	1.558	1.16688	polished rock slab
Zhenfeng_Yangtze Platform	M1	48	3.12	1.306	2.38897	polished rock slab
Zhenfeng_Yangtze Platform	M1	49	1.904	1.65	1.15394	polished rock slab
Zhenfeng_Yangtze Platform	M1	50	1.387	1.363	1.01761	polished rock slab
Zhenfeng_Yangtze Platform	M1	51	1.587	1.571	1.01018	polished rock slab
Zhenfeng_Yangtze Platform	M1	52	1.924	1.649	1.16677	polished rock slab
Zhenfeng_Yangtze Platform	M1	53	2.058	1.523	1.35128	polished rock slab
Zhenfeng_Yangtze Platform	M1	54	1.842	1.452	1.2686	polished rock slab
Zhenfeng_Yangtze Platform	M1	55	1.689	1.479	1.14199	polished rock slab
Zhenfeng_Yangtze Platform	M1	56	1.735	1.546	1.12225	polished rock slab
Zhenfeng_Yangtze Platform	M1	57	2.153	1.229	1.75183	polished rock slab
Zhenfeng_Yangtze Platform	M1	58	1.935	1.318	1.46813	polished rock slab
Zhenfeng_Yangtze Platform	M1	59	1.925	1.806	1.06589	polished rock slab
Zhenfeng_Yangtze Platform	M1	60	1.553	1.486	1.04509	polished rock slab
Zhenfeng_Yangtze Platform	M1	61	1.836	1.724	1.06497	polished rock slab
Zhenfeng_Yangtze Platform	M1	62	2.051	1.683	1.21866	polished rock slab
Zhenfeng_Yangtze Platform	M1	63	1.919	1.84	1.04293	polished rock slab
Zhenfeng_Yangtze Platform	M1	64	1.795	1.738	1.0328	polished rock slab
Zhenfeng_Yangtze Platform	M1	65	2.03	1.944	1.04424	polished rock slab
Zhenfeng_Yangtze Platform	M1	66	2.051	1.638	1.25214	polished rock slab
Zhenfeng_Yangtze Platform	M1	67	2.034	1.706	1.19226	polished rock slab
Zhenfeng_Yangtze Platform	M1	68	1.926	1.619	1.18962	polished rock slab
Zhenfeng_Yangtze Platform	M1	69	2.063	1.786	1.1551	polished rock slab
Zhenfeng_Yangtze Platform	M1	70	2.111	1.98	1.06616	polished rock slab
Zhenfeng_Yangtze Platform	M1	71	2.042	1.54	1.32597	polished rock slab
Zhenfeng_Yangtze Platform	M2	1	1.523	0.821	1.85505	polished rock slab
Zhenfeng_Yangtze Platform	M2	2	2.766	2.183	1.26706	polished rock slab
Zhenfeng_Yangtze Platform	M2	3	1.937	1.567	1.23612	polished rock slab
Zhenfeng_Yangtze Platform	M2	4	2.99	2.49	1.2008	polished rock slab
Zhenfeng_Yangtze Platform	M2	5	3.459	2.796	1.23712	polished rock slab
Zhenfeng_Yangtze Platform	M2	6	2.881	2.288	1.25918	polished rock slab
Zhenfeng_Yangtze Platform	M2	7	2.921	2.507	1.16514	polished rock slab
Zhenfeng_Yangtze Platform	M2	8	3.709	3.071	1.20775	polished rock slab
Zhenfeng_Yangtze Platform	M2	9	3.19	2.717	1.17409	polished rock slab
Zhenfeng_Yangtze Platform	M2	10	1.43	1.058	1.35161	polished rock slab
Zhenfeng_Yangtze Platform	M2	11	2.713	2.348	1.15545	polished rock slab
Zhenfeng_Yangtze Platform	M2	12	2.014	1.663	1.21106	polished rock slab
Zhenfeng_Yangtze Platform	M2	13	1.634	1.362	1.19971	polished rock slab
Zhenfeng_Yangtze Platform	M2	14	3.664	3.188	1.14931	polished rock slab
Zhenfeng_Yangtze Platform	M2	15	4.442	3.436	1.29278	polished rock slab
Zhenfeng_Yangtze Platform	M2	16	2.363	1.808	1.30697	polished rock slab
Zhenfeng_Yangtze Platform	M2	17	1.844	1.207	1.52775	polished rock slab
Zhenfeng_Yangtze Platform	M2	18	1.161	0.953	1.21826	polished rock slab
Zhenfeng_Yangtze Platform	M2	19	2.459	1.621	1.51696	polished rock slab
Zhenfeng_Yangtze Platform	M2	20	2.116	1.619	1.30698	polished rock slab
Zhenfeng_Yangtze Platform	M2	21	2.113	1.554	1.35972	polished rock slab
Zhenfeng_Yangtze Platform	M2	22	1.834	1.752	1.0468	polished rock slab
Zhenfeng_Yangtze Platform	M2	23	1.45	1.036	1.39961	polished rock slab
Zhenfeng_Yangtze Platform	M2	24	2.556	2.287	1.11762	polished rock slab
Zhenfeng_Yangtze Platform	M2	25	1.396	1.333	1.04726	polished rock slab
Zhenfeng_Yangtze Platform	M2	26	1.396	1.115	1.25202	polished rock slab
Zhenfeng_Yangtze Platform	M2	27	2.011	1.45	1.3869	polished rock slab
Zhenfeng_Yangtze Platform	M2	28	2.589	2.186	1.18435	polished rock slab
Zhenfeng_Yangtze Platform	M2	29	3.326	2.878	1.15566	polished rock slab
Zhenfeng_Yangtze Platform	M2	30	2.863	2.593	1.10413	polished rock slab
Zhenfeng_Yangtze Platform	M2	31	1.768	1.467	1.20518	polished rock slab
Zhenfeng_Yangtze Platform	M2	32	2.759	2.419	1.14055	polished rock slab
Zhenfeng_Yangtze Platform	M2	33	1.904	1.455	1.30859	polished rock slab
Zhenfeng_Yangtze Platform	M2	34	3.26	2.455	1.3279	polished rock slab
Zhenfeng_Yangtze Platform	M2	35	1.408	1.347	1.04529	polished rock slab
Zhenfeng_Yangtze Platform	M2	36	2.659	1.999	1.33017	polished rock slab
Zhenfeng_Yangtze Platform	M2	37	3.456	3.004	1.15047	polished rock slab
Zhenfeng_Yangtze Platform	M2	38	1.189	1.076	1.10502	polished rock slab
Zhenfeng_Yangtze Platform	M2	39	4.41	4.367	1.00985	polished rock slab
Zhenfeng_Yangtze Platform	M2	40	1.596	1.062	1.50282	polished rock slab
Zhenfeng_Yangtze Platform	M2	41	1.58	1.303	1.21259	polished rock slab
Zhenfeng_Yangtze Platform	M2	42	1.235	1.058	1.1673	polished rock slab
Zhenfeng_Yangtze Platform	M2	43	1.074	0.829	1.29554	polished rock slab
Zhenfeng_Yangtze Platform	M2	44	3.594	2.768	1.29841	polished rock slab
Zhenfeng_Yangtze Platform	M2	45	1.25	1.039	1.20308	polished rock slab
Zhenfeng_Yangtze Platform	M2	46	3.705	2.966	1.24916	polished rock slab
Zhenfeng_Yangtze Platform	M2	47	2.484	2.235	1.11141	polished rock slab
Zhenfeng_Yangtze Platform	M2	48	2.727	1.974	1.38146	polished rock slab
Zhenfeng_Yangtze Platform	M2	49	2.198	1.915	1.14778	polished rock slab
Zhenfeng_Yangtze Platform	M2	50	2.629	2.35	1.11872	polished rock slab
Zhenfeng_Yangtze Platform	M2	51	3.214	2.883	1.11481	polished rock slab
Zhenfeng_Yangtze Platform	M2	52	2.058	1.669	1.23307	polished rock slab
Zhenfeng_Yangtze Platform	M2	53	2.163	1.971	1.09741	polished rock slab
Zhenfeng_Yangtze Platform	M2	54	1.682	1.285	1.30895	polished rock slab
Zhenfeng_Yangtze Platform	M2	55	1.84	1.642	1.12058	polished rock slab
Zhenfeng_Yangtze Platform	M2	56	4.213	1.52	2.77171	polished rock slab
Zhenfeng_Yangtze Platform	M2	57	2.141	1.786	1.19877	polished rock slab
Zhenfeng_Yangtze Platform	M2	58	2.475	1.899	1.30332	polished rock slab
Zhenfeng_Yangtze Platform	M2	59	1.943	1.778	1.0928	polished rock slab
Zhenfeng_Yangtze Platform	M2	60	1.468	1.381	1.063	polished rock slab
Zhenfeng_Yangtze Platform	M2	61	2.187	1.495	1.46288	polished rock slab
Zhenfeng_Yangtze Platform	M2	62	2.431	2.127	1.14292	polished rock slab
Zhenfeng_Yangtze Platform	M2	63	2.9	1.913	1.51594	polished rock slab
Zhenfeng_Yangtze Platform	M2	64	1.984	1.519	1.30612	polished rock slab
Zhenfeng_Yangtze Platform	M2	65	2.832	2.359	1.20051	polished rock slab
Zhenfeng_Yangtze Platform	M2	66	1.435	1.227	1.16952	polished rock slab
Zhenfeng_Yangtze Platform	M2	67	2.513	2.154	1.16667	polished rock slab
Zhenfeng_Yangtze Platform	M2	68	3.867	3.382	1.14341	polished rock slab
Zhenfeng_Yangtze Platform	M2	69	1.902	1.408	1.35085	polished rock slab
Zhenfeng_Yangtze Platform	M2	70	3.292	2.575	1.27845	polished rock slab
Zhenfeng_Yangtze Platform	M2	71	2.816	2.261	1.24547	polished rock slab
Zhenfeng_Yangtze Platform	M2	72	1.8	1.354	1.32939	polished rock slab
Zhenfeng_Yangtze Platform	M2	73	2.66	2.388	1.1139	polished rock slab
Zhenfeng_Yangtze Platform	M2	74	1.803	1.474	1.2232	polished rock slab
Zhenfeng_Yangtze Platform	M2	75	3.144	2.622	1.19908	polished rock slab
Zhenfeng_Yangtze Platform	M2	76	3.805	2.779	1.3692	polished rock slab
Zhenfeng_Yangtze Platform	M2	77	3.417	2.696	1.26743	polished rock slab
Zhenfeng_Yangtze Platform	M2	78	2.375	2.212	1.07369	polished rock slab
Zhenfeng_Yangtze Platform	M2	79	3.658	3.038	1.20408	polished rock slab
Zhenfeng_Yangtze Platform	M2	80	2.433	2.154	1.12953	polished rock slab
Zhenfeng_Yangtze Platform	M2	81	1.886	1.699	1.11006	polished rock slab
Zhenfeng_Yangtze Platform	M2	82	2.482	2.106	1.17854	polished rock slab
Zhenfeng_Yangtze Platform	M2	83	2.874	2.434	1.18077	polished rock slab
Zhenfeng_Yangtze Platform	M2	84	2.596	2.264	1.14664	polished rock slab
Zhenfeng_Yangtze Platform	M2	85	1.195	0.778	1.53599	polished rock slab
Zhenfeng_Yangtze Platform	M2	86	1.6	1.205	1.3278	polished rock slab
Zhenfeng_Yangtze Platform	M2	87	2.893	2.701	1.07108	polished rock slab
Zhenfeng_Yangtze Platform	M2	88	1.112	0.76	1.46316	polished rock slab
Zhenfeng_Yangtze Platform	M2	89	1.305	1.08	1.20833	polished rock slab
Zhenfeng_Yangtze Platform	M2	90	1.257	1.049	1.19828	polished rock slab
Zhenfeng_Yangtze Platform	M2	91	3.679	2.989	1.23085	polished rock slab
Zhenfeng_Yangtze Platform	M2	92	1.3	0.828	1.57005	polished rock slab
Zhenfeng_Yangtze Platform	M2	93	2.391	1.878	1.27316	polished rock slab
Zhenfeng_Yangtze Platform	M2	94	1.066	0.805	1.32422	polished rock slab
Zhenfeng_Yangtze Platform	M2	95	1.321	1.223	1.08013	polished rock slab
Zhenfeng_Yangtze Platform	M2	96	1.418	1.144	1.23951	polished rock slab
Zhenfeng_Yangtze Platform	M2	97	2.136	1.824	1.17105	polished rock slab
Zhenfeng_Yangtze Platform	M2	98	2.019	1.961	1.02958	polished rock slab
Zhenfeng_Yangtze Platform	M2	99	2.872	2.817	1.01952	polished rock slab
Zhenfeng_Yangtze Platform	M2	100	2.253	2.237	1.00715	polished rock slab
Zhenfeng_Yangtze Platform	M2	101	1.734	1.587	1.09263	polished rock slab
Zhenfeng_Yangtze Platform	M2	102	2.955	2.541	1.16293	polished rock slab
Zhenfeng_Yangtze Platform	M2	103	2.552	2.083	1.22516	polished rock slab
Zhenfeng_Yangtze Platform	M2	104	3.975	3.905	1.01793	polished rock slab
Zhenfeng_Yangtze Platform	M2	105	2.448	2.223	1.10121	polished rock slab
Zhenfeng_Yangtze Platform	M2	106	2.33	1.786	1.30459	polished rock slab
Zhenfeng_Yangtze Platform	M2	107	2.616	1.984	1.31855	polished rock slab
Zhenfeng_Yangtze Platform	M2	108	1.715	1.362	1.25918	polished rock slab
Zhenfeng_Yangtze Platform	M2	109	2.781	2.696	1.03153	polished rock slab
Zhenfeng_Yangtze Platform	M2	110	2.26	1.976	1.14372	polished rock slab
Zhenfeng_Yangtze Platform	M2	111	1.812	1.531	1.18354	polished rock slab
Zhenfeng_Yangtze Platform	M2	112	2.326	0.976	2.3832	polished rock slab
Zhenfeng_Yangtze Platform	M2	113	2.86	2.443	1.17069	polished rock slab
Zhenfeng_Yangtze Platform	M2	114	2.624	2.099	1.25012	polished rock slab
Zhenfeng_Yangtze Platform	M2	115	3.357	2.393	1.40284	polished rock slab
Zhenfeng_Yangtze Platform	M2	116	1.839	1.674	1.09857	polished rock slab
Zhenfeng_Yangtze Platform	M2	117	1.923	1.543	1.24627	polished rock slab
Zhenfeng_Yangtze Platform	M2	118	3.532	3.337	1.05844	polished rock slab
Zhenfeng_Yangtze Platform	M2	119	3.73	3.187	1.17038	polished rock slab
Zhenfeng_Yangtze Platform	M2	120	2.04	1.751	1.16505	polished rock slab
Zhenfeng_Yangtze Platform	M2	121	1.578	1.271	1.24154	polished rock slab
Zhenfeng_Yangtze Platform	M2	122	2.199	1.498	1.46796	polished rock slab
Zhenfeng_Yangtze Platform	M2	123	2.238	2.023	1.10628	polished rock slab
Zhenfeng_Yangtze Platform	M2	124	3.042	2.854	1.06587	polished rock slab
Zhenfeng_Yangtze Platform	M2	125	1.885	1.585	1.18927	polished rock slab
Zhenfeng_Yangtze Platform	M2	126	3.507	2.901	1.20889	polished rock slab
Zhenfeng_Yangtze Platform	M2	127	2.023	0.877	2.30673	polished rock slab
Zhenfeng_Yangtze Platform	M2	128	1.507	1.118	1.34794	polished rock slab
Zhenfeng_Yangtze Platform	M2	129	1.641	1.218	1.34729	polished rock slab
Zhenfeng_Yangtze Platform	M2	130	1.714	1.583	1.08275	polished rock slab
Zhenfeng_Yangtze Platform	M2	131	2.468	2.108	1.17078	polished rock slab
Zhenfeng_Yangtze Platform	M2	132	2.391	2.086	1.14621	polished rock slab
Zhenfeng_Yangtze Platform	M2	133	1.788	1.005	1.7791	polished rock slab
Zhenfeng_Yangtze Platform	M2	134	0.979	0.76	1.28816	polished rock slab
Zhenfeng_Yangtze Platform	M2	135	3.783	3.48	1.08707	polished rock slab
Zhenfeng_Yangtze Platform	M2	136	3.329	1.991	1.67202	polished rock slab
Zhenfeng_Yangtze Platform	M2	137	4.1	3.673	1.11625	polished rock slab
Zhenfeng_Yangtze Platform	M2	138	2.543	2.109	1.20578	polished rock slab
Zhenfeng_Yangtze Platform	M2	139	1.891	1.312	1.44131	polished rock slab
Zhenfeng_Yangtze Platform	M2	140	2.043	1.668	1.22482	polished rock slab
Zhenfeng_Yangtze Platform	M2	141	2.734	2.521	1.08449	polished rock slab
Zhenfeng_Yangtze Platform	M2	142	2.425	2.125	1.14118	polished rock slab
Zhenfeng_Yangtze Platform	M2	143	2.184	2.028	1.07692	polished rock slab
Zhenfeng_Yangtze Platform	M2	144	3.707	3.163	1.17199	polished rock slab
Zhenfeng_Yangtze Platform	M2	145	4.15	3.597	1.15374	polished rock slab
Zhenfeng_Yangtze Platform	M2	146	1.419	1.172	1.21075	polished rock slab
Zhenfeng_Yangtze Platform	M2	147	2.016	1.633	1.23454	polished rock slab
Zhenfeng_Yangtze Platform	M2	148	2.544	2.275	1.11824	polished rock slab
Zhenfeng_Yangtze Platform	M2	149	1.277	0.988	1.29251	polished rock slab
Zhenfeng_Yangtze Platform	M2	150	1.422	0.631	2.25357	polished rock slab
Zhenfeng_Yangtze Platform	M2	151	1.989	1.559	1.27582	polished rock slab
Zhenfeng_Yangtze Platform	M2	152	2.64	2.26	1.16814	polished rock slab
Zhenfeng_Yangtze Platform	M2	153	3.583	3.042	1.17784	polished rock slab
Zhenfeng_Yangtze Platform	M2	154	3.262	2.799	1.16542	polished rock slab
Zhenfeng_Yangtze Platform	M2	155	3.443	3.418	1.00731	polished rock slab
Zhenfeng_Yangtze Platform	M2	156	2.672	2.334	1.14482	polished rock slab
Zhenfeng_Yangtze Platform	M2	157	2.601	2.495	1.04248	polished rock slab
Zhenfeng_Yangtze Platform	M2	158	3.325	2.68	1.24067	polished rock slab
Zhenfeng_Yangtze Platform	M2	159	2.207	1.435	1.53798	polished rock slab
Zhenfeng_Yangtze Platform	M2	160	1.267	1.23	1.03008	polished rock slab
Zhenfeng_Yangtze Platform	M2	161	3.336	3.028	1.10172	polished rock slab
Zhenfeng_Yangtze Platform	M2	162	1.204	0.79	1.52405	polished rock slab
Zhenfeng_Yangtze Platform	M2	163	2.163	1.695	1.27611	polished rock slab
Zhenfeng_Yangtze Platform	M2	164	2.416	2.004	1.20559	polished rock slab
Zhenfeng_Yangtze Platform	M2	165	3.165	3.12	1.01442	polished rock slab
Zhenfeng_Yangtze Platform	M2	166	1.543	0.899	1.71635	polished rock slab
Zhenfeng_Yangtze Platform	M2	167	3.648	3.206	1.13787	polished rock slab
Zhenfeng_Yangtze Platform	M2	168	1.575	1.216	1.29523	polished rock slab
Zhenfeng_Yangtze Platform	M2	169	2.062	1.889	1.09158	polished rock slab
Zhenfeng_Yangtze Platform	M2	170	2.72	2.462	1.10479	polished rock slab
Zhenfeng_Yangtze Platform	M2	171	3.071	2.77	1.10866	polished rock slab
Zhenfeng_Yangtze Platform	M2	172	1.312	1.16	1.13103	polished rock slab
Zhenfeng_Yangtze Platform	M2	173	2.02	1.852	1.09071	polished rock slab
Zhenfeng_Yangtze Platform	M2	174	2.688	2.363	1.13754	polished rock slab
Zhenfeng_Yangtze Platform	M2	175	2.995	2.528	1.18473	polished rock slab
Zhenfeng_Yangtze Platform	M2	176	3.292	2.995	1.09917	polished rock slab
Zhenfeng_Yangtze Platform	M2	177	2.411	2.204	1.09392	polished rock slab
Zhenfeng_Yangtze Platform	M2	178	3.456	2.425	1.42515	polished rock slab
Zhenfeng_Yangtze Platform	M2	179	2.084	1.679	1.24122	polished rock slab
Zhenfeng_Yangtze Platform	M2	180	2.789	2.487	1.12143	polished rock slab
Zhenfeng_Yangtze Platform	M2	181	3.419	2.828	1.20898	polished rock slab
Zhenfeng_Yangtze Platform	M2	182	3.705	3.412	1.08587	polished rock slab
Zhenfeng_Yangtze Platform	M2	183	4.611	3.822	1.20644	polished rock slab
Zhenfeng_Yangtze Platform	M2	184	1.346	1.099	1.22475	polished rock slab
Zhenfeng_Yangtze Platform	M2	185	2.794	2.658	1.05117	polished rock slab
Zhenfeng_Yangtze Platform	M2	186	3.164	2.935	1.07802	polished rock slab
Zhenfeng_Yangtze Platform	M2	187	2.439	2.097	1.16309	polished rock slab
Zhenfeng_Yangtze Platform	M2	188	1.763	1.551	1.13669	polished rock slab
Zhenfeng_Yangtze Platform	M2	189	1.748	1.549	1.12847	polished rock slab
Zhenfeng_Yangtze Platform	M2	190	1.023	0.684	1.49561	polished rock slab
Zhenfeng_Yangtze Platform	M2	191	1.91	1.276	1.49687	polished rock slab
Zhenfeng_Yangtze Platform	M2	192	3.137	3.022	1.03805	polished rock slab
Zhenfeng_Yangtze Platform	M2	193	1.773	1.181	1.50127	polished rock slab
Zhenfeng_Yangtze Platform	M2	194	2.349	2.189	1.07309	polished rock slab
Zhenfeng_Yangtze Platform	M2	195	2.608	2.552	1.02194	polished rock slab
Zhenfeng_Yangtze Platform	M2	196	2.077	1.532	1.35574	polished rock slab
Zhenfeng_Yangtze Platform	M2	197	1.583	1.41	1.1227	polished rock slab
Zhenfeng_Yangtze Platform	M2	198	3.974	3.967	1.00176	polished rock slab
Zhenfeng_Yangtze Platform	M2	199	3.151	2.8	1.12536	polished rock slab
Zhenfeng_Yangtze Platform	M2	200	1.521	1.126	1.3508	polished rock slab
Zhenfeng_Yangtze Platform	M2	201	2.502	2.012	1.24354	polished rock slab
Zhenfeng_Yangtze Platform	M2	202	2.14	2.056	1.04086	polished rock slab
Zhenfeng_Yangtze Platform	M2	203	3.012	2.679	1.1243	polished rock slab
Zhenfeng_Yangtze Platform	M2	204	3.738	2.9	1.28897	polished rock slab
Zhenfeng_Yangtze Platform	M2	205	3.293	3.215	1.02426	polished rock slab
Zhenfeng_Yangtze Platform	M2	206	2.831	2.446	1.1574	polished rock slab
Zhenfeng_Yangtze Platform	M2	207	3.822	2.734	1.39795	polished rock slab
Zhenfeng_Yangtze Platform	M2	208	2.687	1.93	1.39223	polished rock slab
Zhenfeng_Yangtze Platform	M2	209	2.079	1.95	1.06615	polished rock slab
Zhenfeng_Yangtze Platform	M2	210	3.939	3.535	1.11429	polished rock slab
Zhenfeng_Yangtze Platform	M2	211	1.668	1.385	1.20433	polished rock slab
Zhenfeng_Yangtze Platform	M2	212	1.869	1.493	1.25184	polished rock slab
Zhenfeng_Yangtze Platform	M2	213	3.894	2.623	1.48456	polished rock slab
Zhenfeng_Yangtze Platform	M2	214	4.198	3.758	1.11708	polished rock slab
Zhenfeng_Yangtze Platform	M2	215	2.894	2.827	1.0237	polished rock slab
Zhenfeng_Yangtze Platform	M2	216	1.57	0.642	2.44548	polished rock slab
Zhenfeng_Yangtze Platform	M2	217	3.479	3.148	1.10515	polished rock slab
Zhenfeng_Yangtze Platform	M2	218	2.974	2.883	1.03156	polished rock slab
Zhenfeng_Yangtze Platform	M2	219	1.583	1.23	1.28699	polished rock slab
Zhenfeng_Yangtze Platform	M2	220	2.541	2.154	1.17967	polished rock slab
Zhenfeng_Yangtze Platform	M2	221	3.004	2.175	1.38115	polished rock slab
Zhenfeng_Yangtze Platform	M2	222	1.701	1.311	1.29748	polished rock slab
Zhenfeng_Yangtze Platform	M2	223	3.047	2.075	1.46843	polished rock slab
Zhenfeng_Yangtze Platform	M2	224	2.243	1.501	1.49434	polished rock slab
Zhenfeng_Yangtze Platform	M2	225	1.831	1.777	1.03039	polished rock slab
Zhenfeng_Yangtze Platform	M2	226	2.263	1.77	1.27853	polished rock slab
Zhenfeng_Yangtze Platform	M2	227	1.717	1.599	1.0738	polished rock slab
Zhenfeng_Yangtze Platform	M2	228	2.884	2.669	1.08055	polished rock slab
Zhenfeng_Yangtze Platform	M2	229	2.332	2.174	1.07268	polished rock slab
Zhenfeng_Yangtze Platform	M2	230	2.351	2.184	1.07647	polished rock slab
Zhenfeng_Yangtze Platform	M2	231	3.506	3.289	1.06598	polished rock slab
Zhenfeng_Yangtze Platform	M2	232	3.699	3.56	1.03904	polished rock slab
Zhenfeng_Yangtze Platform	M2	233	2.714	2.708	1.00222	polished rock slab
Zhenfeng_Yangtze Platform	M2	234	2.121	1.769	1.19898	polished rock slab
Zhenfeng_Yangtze Platform	M2	235	3.802	2.957	1.28576	polished rock slab
Zhenfeng_Yangtze Platform	M2	236	1.89	1.57	1.20382	polished rock slab
Zhenfeng_Yangtze Platform	M2	237	2.279	2.055	1.109	polished rock slab
Zhenfeng_Yangtze Platform	M2	238	3.646	3.231	1.12844	polished rock slab
Zhenfeng_Yangtze Platform	M2	239	3.265	2.913	1.12084	polished rock slab
Zhenfeng_Yangtze Platform	M2	240	2.494	1.677	1.48718	polished rock slab
Zhenfeng_Yangtze Platform	M2	241	2.638	2.364	1.11591	polished rock slab
Zhenfeng_Yangtze Platform	M2	242	3.859	3.4	1.135	polished rock slab
Zhenfeng_Yangtze Platform	M2	243	4.452	3.867	1.15128	polished rock slab
Zhenfeng_Yangtze Platform	M2	244	2.541	1.88	1.3516	polished rock slab
Zhenfeng_Yangtze Platform	M2	245	3.293	3.127	1.05309	polished rock slab
Zhenfeng_Yangtze Platform	M2	246	2.849	2.634	1.08162	polished rock slab
Zhenfeng_Yangtze Platform	M2	247	3.692	3.282	1.12492	polished rock slab
Zhenfeng_Yangtze Platform	M2	248	2.054	1.697	1.21037	polished rock slab
Zhenfeng_Yangtze Platform	M2	249	2.268	1.88	1.20638	polished rock slab
Zhenfeng_Yangtze Platform	M2	250	3.006	2.759	1.08953	polished rock slab
Zhenfeng_Yangtze Platform	M2	251	2.05	1.392	1.4727	polished rock slab
Zhenfeng_Yangtze Platform	M2	252	2.403	1.674	1.43548	polished rock slab
Zhenfeng_Yangtze Platform	M2	253	2.174	1.773	1.22617	polished rock slab
Zhenfeng_Yangtze Platform	M2	254	1.179	0.945	1.24762	polished rock slab
Zhenfeng_Yangtze Platform	M2	255	2.41	1.651	1.45972	polished rock slab
Zhenfeng_Yangtze Platform	M2	256	2.568	2.383	1.07763	polished rock slab
Zhenfeng_Yangtze Platform	M2	257	2.27	1.823	1.2452	polished rock slab
Zhenfeng_Yangtze Platform	M2	258	2.918	2.501	1.16673	polished rock slab
Zhenfeng_Yangtze Platform	M2	259	3.197	2.842	1.12491	polished rock slab
Zhenfeng_Yangtze Platform	M2	260	1.831	1.395	1.31254	polished rock slab
Zhenfeng_Yangtze Platform	M2	261	2.282	1.993	1.14501	polished rock slab
Zhenfeng_Yangtze Platform	M2	262	2.238	1.511	1.48114	polished rock slab
Zhenfeng_Yangtze Platform	M2	263	1.4	1.159	1.20794	polished rock slab
Zhenfeng_Yangtze Platform	M2	264	1.537	1.293	1.18871	polished rock slab
Zhenfeng_Yangtze Platform	M2	265	1.535	1.206	1.2728	polished rock slab
Zhenfeng_Yangtze Platform	M2	266	2.369	1.684	1.40677	polished rock slab
Zhenfeng_Yangtze Platform	M2	267	2.84	2.527	1.12386	polished rock slab
Zhenfeng_Yangtze Platform	M2	268	2.486	2.279	1.09083	polished rock slab
Zhenfeng_Yangtze Platform	M2	269	3.641	3.351	1.08654	polished rock slab
Zhenfeng_Yangtze Platform	M2	270	1.963	1.45	1.35379	polished rock slab
Zhenfeng_Yangtze Platform	M2	271	1.62	1.228	1.31922	polished rock slab
Zhenfeng_Yangtze Platform	M2	272	1.38	1.156	1.19377	polished rock slab
Zhenfeng_Yangtze Platform	M2	273	1.564	1.247	1.25421	polished rock slab
Zhenfeng_Yangtze Platform	M2	274	1.523	1.002	1.51996	polished rock slab
Zhenfeng_Yangtze Platform	M2	275	1.768	1.297	1.36315	polished rock slab
Zhenfeng_Yangtze Platform	M2	276	2.592	1.784	1.45291	polished rock slab
Zhenfeng_Yangtze Platform	M2	277	1.684	1.488	1.13172	polished rock slab
Zhenfeng_Yangtze Platform	M2	278	2.413	2.376	1.01557	polished rock slab
Zhenfeng_Yangtze Platform	M2	279	2.572	2.106	1.22127	polished rock slab
Zhenfeng_Yangtze Platform	M2	280	2.124	1.752	1.21233	polished rock slab
Zhenfeng_Yangtze Platform	M2	281	2.973	2.948	1.00848	polished rock slab
Zhenfeng_Yangtze Platform	M2	282	3.638	3.194	1.13901	polished rock slab
Zhenfeng_Yangtze Platform	M2	283	1.368	1.109	1.23354	polished rock slab
Zhenfeng_Yangtze Platform	M2	284	2.006	1.933	1.03777	polished rock slab
Zhenfeng_Yangtze Platform	M2	285	1.413	1.121	1.26048	polished rock slab
Zhenfeng_Yangtze Platform	M2	286	2.858	2.475	1.15475	polished rock slab
Zhenfeng_Yangtze Platform	M2	287	3.977	3.535	1.12504	polished rock slab
Zhenfeng_Yangtze Platform	M2	288	1.52	1.286	1.18196	polished rock slab
Zhenfeng_Yangtze Platform	M2	289	2.482	2.016	1.23115	polished rock slab
Zhenfeng_Yangtze Platform	M2	290	3.367	2.738	1.22973	polished rock slab
Zhenfeng_Yangtze Platform	M2	291	1.893	1.835	1.03161	polished rock slab
Zhenfeng_Yangtze Platform	M2	292	1.905	1.618	1.17738	polished rock slab
Zhenfeng_Yangtze Platform	M2	293	2.97	2.615	1.13576	polished rock slab
Zhenfeng_Yangtze Platform	M2	294	3.262	2.674	1.2199	polished rock slab
Zhenfeng_Yangtze Platform	M2	295	2.811	2.244	1.25267	polished rock slab
Zhenfeng_Yangtze Platform	M2	296	3.51	2.824	1.24292	polished rock slab
Zhenfeng_Yangtze Platform	M2	297	2.534	2.18	1.16239	polished rock slab
Zhenfeng_Yangtze Platform	M2	298	2.138	1.935	1.10491	polished rock slab
Zhenfeng_Yangtze Platform	M2	299	3.029	2.631	1.15127	polished rock slab
Zhenfeng_Yangtze Platform	M2	300	2.087	1.568	1.33099	polished rock slab
Zhenfeng_Yangtze Platform	M2	301	3.466	2.871	1.20724	polished rock slab
Zhenfeng_Yangtze Platform	M2	302	2.319	1.935	1.19845	polished rock slab
Zhenfeng_Yangtze Platform	M2	303	1.975	1.783	1.10768	polished rock slab
Zhenfeng_Yangtze Platform	M2	304	2.056	1.756	1.17084	polished rock slab
Zhenfeng_Yangtze Platform	M2	305	2.167	1.682	1.28835	polished rock slab
Zhenfeng_Yangtze Platform	M2	306	3.163	2.759	1.14643	polished rock slab
Zhenfeng_Yangtze Platform	M2	307	2.102	1.826	1.15115	polished rock slab
Zhenfeng_Yangtze Platform	M2	308	2.92	2.713	1.0763	polished rock slab
Zhenfeng_Yangtze Platform	M2	309	2.858	2.703	1.05734	polished rock slab
Zhenfeng_Yangtze Platform	M2	310	2.734	2.568	1.06464	polished rock slab
Zhenfeng_Yangtze Platform	M2	311	3.77	3.26	1.15644	polished rock slab
Zhenfeng_Yangtze Platform	M2	312	2.726	2.32	1.175	polished rock slab
Zhenfeng_Yangtze Platform	M2	313	3.019	2.047	1.47484	polished rock slab
Zhenfeng_Yangtze Platform	M2	314	2.115	1.616	1.30879	polished rock slab
Zhenfeng_Yangtze Platform	M2	315	2.929	2.656	1.10279	polished rock slab
Zhenfeng_Yangtze Platform	M2	316	2.242	2.083	1.07633	polished rock slab
Zhenfeng_Yangtze Platform	M2	317	2.819	2.508	1.124	polished rock slab
Zhenfeng_Yangtze Platform	M2	318	3.618	3.527	1.0258	polished rock slab
Zhenfeng_Yangtze Platform	M2	319	2.764	2.489	1.11049	polished rock slab
Zhenfeng_Yangtze Platform	M2	320	2.625	2.543	1.03225	polished rock slab
Zhenfeng_Yangtze Platform	M2	321	3.111	2.859	1.08814	polished rock slab
Zhenfeng_Yangtze Platform	M2	322	4.184	3.377	1.23897	polished rock slab
Zhenfeng_Yangtze Platform	M2	323	3.83	3.632	1.05452	polished rock slab
Zhenfeng_Yangtze Platform	M2	324	2.331	2.25	1.036	polished rock slab
Zhenfeng_Yangtze Platform	M2	325	2.078	1.748	1.18879	polished rock slab
Zhenfeng_Yangtze Platform	M2	326	2.04	1.708	1.19438	polished rock slab
Zhenfeng_Yangtze Platform	M2	327	1.748	1.559	1.12123	polished rock slab
Zhenfeng_Yangtze Platform	M2	328	3.69	3.549	1.03973	polished rock slab
Zhenfeng_Yangtze Platform	M2	329	2.719	2.298	1.1832	polished rock slab
Zhenfeng_Yangtze Platform	M2	330	2.179	1.849	1.17847	polished rock slab
Zhenfeng_Yangtze Platform	M2	331	2.322	1.951	1.19016	polished rock slab
Zhenfeng_Yangtze Platform	M2	332	3.083	2.72	1.13346	polished rock slab
Zhenfeng_Yangtze Platform	M2	333	1.782	1.635	1.08991	polished rock slab
Zhenfeng_Yangtze Platform	M2	334	2.248	1.901	1.18254	polished rock slab
Zhenfeng_Yangtze Platform	M2	335	2.452	2.125	1.15388	polished rock slab
Zhenfeng_Yangtze Platform	M2	336	2.458	2.015	1.21985	polished rock slab
Zhenfeng_Yangtze Platform	M2	337	2.571	2.285	1.12516	polished rock slab
Zhenfeng_Yangtze Platform	M2	338	2.509	2.161	1.16104	polished rock slab
Zhenfeng_Yangtze Platform	M2	339	2.507	1.889	1.32716	polished rock slab
Zhenfeng_Yangtze Platform	M2	340	2.288	2.131	1.07367	polished rock slab
Zhenfeng_Yangtze Platform	M2	341	2.734	2.513	1.08794	polished rock slab
Zhenfeng_Yangtze Platform	M2	342	2.928	2.71	1.08044	polished rock slab
Zhenfeng_Yangtze Platform	M2	343	2.86	2.502	1.14309	polished rock slab
Zhenfeng_Yangtze Platform	M2	344	2.023	1.754	1.15336	polished rock slab
Zhenfeng_Yangtze Platform	M2	345	2.633	2.433	1.0822	polished rock slab
Zhenfeng_Yangtze Platform	M2	346	1.235	1.111	1.11161	polished rock slab
Zhenfeng_Yangtze Platform	M2	347	3.645	3.645	1	polished rock slab
Zhenfeng_Yangtze Platform	M2	348	2.25	2.125	1.05882	polished rock slab
Zhenfeng_Yangtze Platform	M2	349	2.996	2.518	1.18983	polished rock slab
Zhenfeng_Yangtze Platform	M2	350	2.781	2.409	1.15442	polished rock slab
Zhenfeng_Yangtze Platform	M2	351	2.11	1.738	1.21404	polished rock slab
Zhenfeng_Yangtze Platform	M2	352	4.181	3.702	1.12939	polished rock slab
Zhenfeng_Yangtze Platform	M2	353	2.359	2.151	1.0967	polished rock slab
Zhenfeng_Yangtze Platform	M2	354	2.305	2.282	1.01008	polished rock slab
Zhenfeng_Yangtze Platform	M2	355	4.453	3.943	1.12934	polished rock slab
Zhenfeng_Yangtze Platform	M2	356	2.124	2.092	1.0153	polished rock slab
Zhenfeng_Yangtze Platform	M2	357	2.359	1.983	1.18961	polished rock slab
Zhenfeng_Yangtze Platform	M2	358	2.903	2.798	1.03753	polished rock slab
Zhenfeng_Yangtze Platform	M2	359	1.252	1.016	1.23228	polished rock slab
Zhenfeng_Yangtze Platform	M2	360	3.288	2.928	1.12295	polished rock slab
Zhenfeng_Yangtze Platform	M2	361	2.613	1.996	1.30912	polished rock slab
Zhenfeng_Yangtze Platform	M2	362	1.621	1.385	1.1704	polished rock slab
Zhenfeng_Yangtze Platform	M2	363	4.268	3.812	1.11962	polished rock slab
Zhenfeng_Yangtze Platform	M2	364	2.79	2.238	1.24665	polished rock slab
Zhenfeng_Yangtze Platform	M2	365	2.638	2.226	1.18509	polished rock slab
Zhenfeng_Yangtze Platform	M2	366	3.344	3.093	1.08115	polished rock slab
Zhenfeng_Yangtze Platform	M2	367	3.648	2.964	1.23077	polished rock slab
Zhenfeng_Yangtze Platform	M2	368	1.602	1.135	1.41145	polished rock slab
Zhenfeng_Yangtze Platform	M2	369	3.685	3.135	1.17544	polished rock slab
Zhenfeng_Yangtze Platform	M2	370	1.6	1.303	1.22794	polished rock slab
Zhenfeng_Yangtze Platform	M2	371	1.45	1.17	1.23932	polished rock slab
Zhenfeng_Yangtze Platform	M2	372	2.928	2.351	1.24543	polished rock slab
Zhenfeng_Yangtze Platform	M2	373	3.66	3.268	1.11995	polished rock slab
Zhenfeng_Yangtze Platform	M2	374	3.867	3.456	1.11892	polished rock slab
Zhenfeng_Yangtze Platform	M2	375	3.307	3.216	1.0283	polished rock slab
Zhenfeng_Yangtze Platform	M2	376	3.465	3.385	1.02363	polished rock slab
Zhenfeng_Yangtze Platform	M2	377	2.791	2.183	1.27852	polished rock slab
Zhenfeng_Yangtze Platform	M2	378	1.962	1.622	1.20962	polished rock slab
Zhenfeng_Yangtze Platform	M2	379	1.778	1.563	1.13756	polished rock slab
Zhenfeng_Yangtze Platform	M2	380	1.576	1.298	1.21418	polished rock slab
Zhenfeng_Yangtze Platform	M2	381	3.376	2.804	1.20399	polished rock slab
Zhenfeng_Yangtze Platform	M2	382	3.499	3.013	1.1613	polished rock slab
Zhenfeng_Yangtze Platform	M2	383	2.987	2.955	1.01083	polished rock slab
Zhenfeng_Yangtze Platform	M2	384	1.897	1.855	1.02264	polished rock slab
Zhenfeng_Yangtze Platform	M2	385	2.673	2	1.3365	polished rock slab
Zhenfeng_Yangtze Platform	M2	386	1.69	1.492	1.13271	polished rock slab
Zhenfeng_Yangtze Platform	M2	387	2.413	2.23	1.08206	polished rock slab
Zhenfeng_Yangtze Platform	M2	388	2.679	2.596	1.03197	polished rock slab
Zhenfeng_Yangtze Platform	M2	389	2.497	2.244	1.11275	polished rock slab
Zhenfeng_Yangtze Platform	M2	390	1.907	1.834	1.0398	polished rock slab

## Sheet: Fig 3A to H - simulation result
S (‰)	T (℃)	Patm	pCO2 （ppm)	CO2 (mol/kg)	[HCO3] (mol/kg)	[CO3] (mol/kg)	DIC (mol/kg)	DIC (10^3 μmol/kg)	pH	ALK (mol/kg)	ALK (10^3 μmol/kg)	Mineral	Ooid axes length (mm)	Ω	Tranport intermittency (f)	k (μmol/m^2/hr)	n
41	36	1	4000	8.58e-05	0.00307247	0.000109	0.00326723	3.26723	7.29403	0.00332628	3.32628	aragonite	1	2.172	0.01	45.1	2.4
41	36	1	4000	8.58e-05	0.00380306	0.000167	0.00405581	4.05581	7.38668	0.00418079	4.18079	aragonite	2	3.318	0.01	45.1	2.4
41	36	1	4000	8.58e-05	0.00444367	0.000228	0.00475743	4.75743	7.45429	0.00495017	4.95017	aragonite	3	4.525	0.01	45.1	2.4
41	36	1	4000	8.58e-05	0.0049156	0.000279	0.00528036	5.28036	7.49812	0.00552898	5.52898	aragonite	4	5.531	0.01	45.1	2.4
41	36	1	4000	8.58e-05	0.00521482	0.000314	0.00561458	5.61458	7.52378	0.00590125	5.90125	aragonite	5	6.235	0.01	45.1	2.4
41	36	1	4000	8.58e-05	0.00545826	0.000344	0.00588801	5.88801	7.5436	0.00620714	6.20714	aragonite	6	6.838	0.01	45.1	2.4
41	36	1	4000	8.58e-05	0.00569889	0.000375	0.00615965	6.15965	7.56233	0.00651218	6.51218	aragonite	7	7.441	0.01	45.1	2.4
41	36	1	4000	8.58e-05	0.00365204	0.000154	0.00389179	3.89179	7.36908	0.00400215	4.00215	aragonite	1	3.051	0.05	45.1	2.4
41	36	1	4000	8.58e-05	0.0049156	0.000279	0.00528036	5.28036	7.49812	0.00552898	5.52898	aragonite	2	5.531	0.05	45.1	2.4
41	36	1	4000	8.58e-05	0.00584889	0.000395	0.00632964	6.32964	7.57362	0.00670366	6.70366	aragonite	3	7.844	0.05	45.1	2.4
41	36	1	4000	8.58e-05	0.00652102	0.000491	0.00709778	7.09778	7.62086	0.00757436	7.57436	aragonite	4	9.754	0.05	45.1	2.4
41	36	1	4000	8.58e-05	0.00697658	0.000562	0.00762434	7.62434	7.65019	0.00817629	8.17629	aragonite	5	11.16	0.05	45.1	2.4
41	36	1	4000	8.58e-05	0.00737487	0.000628	0.00808863	8.08863	7.6743	0.00871034	8.71034	aragonite	6	12.47	0.05	45.1	2.4
41	36	1	4000	8.58e-05	0.00772475	0.000689	0.0084995	8.4995	7.69443	0.00918547	9.18547	aragonite	7	13.68	0.05	45.1	2.4
41	36	1	4000	8.58e-05	0.00398107	0.000183	0.00424983	4.24983	7.40654	0.00439271	4.39271	aragonite	1	3.636	0.1	45.1	2.4
41	36	1	4000	8.58e-05	0.00558375	0.00036	0.00602951	6.02951	7.55347	0.00636589	6.36589	aragonite	2	7.151	0.1	45.1	2.4
41	36	1	4000	8.58e-05	0.00669791	0.000518	0.00730167	7.30167	7.63248	0.00780696	7.80696	aragonite	3	10.28	0.1	45.1	2.4
41	36	1	4000	8.58e-05	0.00745662	0.000642	0.00818438	8.18438	7.67909	0.00882085	8.82085	aragonite	4	12.74	0.1	45.1	2.4
41	36	1	4000	8.58e-05	0.00802175	0.000743	0.00885051	8.85051	7.71081	0.00959321	9.59321	aragonite	5	14.75	0.1	45.1	2.4
41	36	1	4000	8.58e-05	0.0084323	0.000821	0.00933906	9.33906	7.73249	0.0101635	10.1635	aragonite	6	16.31	0.1	45.1	2.4
41	36	1	4000	8.58e-05	0.00882868	0.0009	0.00981444	9.81444	7.75244	0.0107214	10.7214	aragonite	7	17.88	0.1	45.1	2.4
41	36	1	4000	8.58e-05	0.00429501	0.000213	0.00459377	4.59377	7.43951	0.00476996	4.76996	aragonite	1	4.222	0.15	45.1	2.4
41	36	1	4000	8.58e-05	0.00600235	0.000416	0.00650411	6.50411	7.58486	0.00690064	6.90064	aragonite	2	8.268	0.15	45.1	2.4
41	36	1	4000	8.58e-05	0.00718452	0.000596	0.00786628	7.86628	7.66294	0.0084542	8.4542	aragonite	3	11.84	0.15	45.1	2.4
41	36	1	4000	8.58e-05	0.00808091	0.000754	0.00892067	8.92067	7.714	0.00967491	9.67491	aragonite	4	14.97	0.15	45.1	2.4
41	36	1	4000	8.58e-05	0.00866531	0.000867	0.00961807	9.61807	7.74433	0.0104906	10.4906	aragonite	5	17.21	0.15	45.1	2.4
41	36	1	4000	8.58e-05	0.00915614	0.000968	0.0102099	10.2099	7.76826	0.0111878	11.1878	aragonite	6	19.22	0.15	45.1	2.4
41	36	1	4000	8.58e-05	0.00958137	0.00106	0.0107271	10.7271	7.78797	0.0118007	11.8007	aragonite	7	21.01	0.15	45.1	2.4
41	36	1	4000	8.58e-05	0.00443392	0.000227	0.00474667	4.74667	7.45333	0.00493832	4.93832	aragonite	1	4.515	0.2	45.1	2.4
41	36	1	4000	8.58e-05	0.00631866	0.000461	0.00686542	6.86542	7.60717	0.00731005	7.31005	aragonite	2	9.162	0.2	45.1	2.4
41	36	1	4000	8.58e-05	0.00758331	0.000664	0.00833307	8.33307	7.6864	0.00899272	8.99272	aragonite	3	13.18	0.2	45.1	2.4
41	36	1	4000	8.58e-05	0.0085496	0.000844	0.00947936	9.47936	7.73849	0.0103278	10.3278	aragonite	4	16.76	0.2	45.1	2.4
41	36	1	4000	8.58e-05	0.00915614	0.000968	0.0102099	10.2099	7.76826	0.0111878	11.1878	aragonite	5	19.22	0.2	45.1	2.4
41	36	1	4000	8.58e-05	0.00967134	0.00108	0.0108371	10.8371	7.79203	0.0119315	11.9315	aragonite	6	21.45	0.2	45.1	2.4
41	36	1	4000	8.58e-05	0.0101092	0.00118	0.0113749	11.3749	7.81126	0.0125731	12.5731	aragonite	7	23.46	0.2	45.1	2.4
41	36	1	4000	8.58e-05	0.00457807	0.000242	0.00490583	4.90583	7.46723	0.00511397	5.11397	aragonite	1	4.808	0.25	45.1	2.4
41	36	1	4000	8.58e-05	0.00662642	0.000507	0.00721917	7.21917	7.62782	0.00771278	7.71278	aragonite	2	10.06	0.25	45.1	2.4
41	36	1	4000	8.58e-05	0.00789661	0.00072	0.00870237	8.70237	7.70398	0.00942092	9.42092	aragonite	3	14.3	0.25	45.1	2.4
41	36	1	4000	8.58e-05	0.00888247	0.000911	0.00987923	9.87923	7.75508	0.0107977	10.7977	aragonite	4	18.1	0.25	45.1	2.4
41	36	1	4000	8.58e-05	0.00958137	0.00106	0.0107271	10.7271	7.78797	0.0118007	11.8007	aragonite	5	21.01	0.25	45.1	2.4
41	36	1	4000	8.58e-05	0.0101092	0.00118	0.0113749	11.3749	7.81126	0.0125731	12.5731	aragonite	6	23.46	0.25	45.1	2.4
41	36	1	4000	8.58e-05	0.0105699	0.00129	0.0119456	11.9456	7.83061	0.0132577	13.2577	aragonite	7	25.7	0.25	45.1	2.4
41	36	1	4000	8.58e-05	0.00471782	0.000257	0.00506058	5.06058	7.48028	0.00528516	5.28516	aragonite	1	5.101	0.3	45.1	2.4
41	36	1	4000	8.58e-05	0.00683867	0.00054	0.00746443	7.46443	7.64152	0.00799306	7.99306	aragonite	2	10.73	0.3	45.1	2.4
41	36	1	4000	8.58e-05	0.00819795	0.000776	0.00905971	9.05971	7.72025	0.00983702	9.83702	aragonite	3	15.42	0.3	45.1	2.4
41	36	1	4000	8.58e-05	0.00920801	0.000979	0.0102728	10.2728	7.77071	0.0112621	11.2621	aragonite	4	19.44	0.3	45.1	2.4
41	36	1	4000	8.58e-05	0.00993635	0.00114	0.0111621	11.1621	7.80377	0.0123188	12.3188	aragonite	5	22.57	0.3	45.1	2.4
41	36	1	4000	8.58e-05	0.0104876	0.00127	0.0118434	11.8434	7.82722	0.0131347	13.1347	aragonite	6	25.25	0.3	45.1	2.4
41	36	1	4000	8.58e-05	0.0110113	0.0014	0.0124971	12.4971	7.84838	0.0139228	13.9228	aragonite	7	27.71	0.3	45.1	2.4
41	36	1	4000	8.58e-05	0.00330339	0.000126	0.00351515	3.51515	7.3255	0.00359373	3.59373	calcite	1	3.636	0.01	3.7	2.3
41	36	1	4000	8.58e-05	0.00463447	0.000248	0.00496823	4.96823	7.47254	0.00518296	5.18296	calcite	2	7.151	0.01	3.7	2.3
41	36	1	4000	8.58e-05	0.00561468	0.000364	0.00606444	6.06444	7.55587	0.00640513	6.40513	calcite	3	10.5	0.01	3.7	2.3
41	36	1	4000	8.58e-05	0.00629119	0.000457	0.00683395	6.83395	7.60528	0.00727431	7.27431	calcite	4	13.18	0.01	3.7	2.3
41	36	1	4000	8.58e-05	0.0069017	0.00055	0.00753746	7.53746	7.6455	0.0080767	8.0767	calcite	5	15.87	0.01	3.7	2.3
41	36	1	4000	8.58e-05	0.00728032	0.000612	0.00797808	7.97808	7.66869	0.0085829	8.5829	calcite	6	17.65	0.01	3.7	2.3
41	36	1	4000	8.58e-05	0.00768541	0.000682	0.00845316	8.45316	7.69221	0.00913177	9.13176	calcite	7	19.66	0.01	3.7	2.3
41	36	1	4000	8.58e-05	0.00423409	0.000207	0.00452684	4.52684	7.4333	0.00469639	4.69639	calcite	1	5.98	0.05	3.7	2.3
41	36	1	4000	8.58e-05	0.0063936	0.000472	0.00695136	6.95136	7.61229	0.00740772	7.40772	calcite	2	13.61	0.05	3.7	2.3
41	36	1	4000	8.58e-05	0.0077806	0.000699	0.00856536	8.56536	7.69756	0.00926184	9.26184	calcite	3	20.17	0.05	3.7	2.3
41	36	1	4000	8.58e-05	0.00878443	0.000891	0.00976119	9.76119	7.75026	0.0106588	10.6588	calcite	4	25.71	0.05	3.7	2.3
41	36	1	4000	8.58e-05	0.00962646	0.00107	0.0107822	10.7822	7.79001	0.0118662	11.8662	calcite	5	30.76	0.05	3.7	2.3
41	36	1	4000	8.58e-05	0.0102791	0.00122	0.0115848	11.5848	7.8185	0.0128244	12.8244	calcite	6	35.29	0.05	3.7	2.3
41	36	1	4000	8.58e-05	0.0107325	0.00133	0.0121482	12.1482	7.83724	0.0135017	13.5017	calcite	7	38.32	0.05	3.7	2.3
41	36	1	4000	8.58e-05	0.00481773	0.000268	0.00517148	5.17148	7.48939	0.0054081	5.4081	calcite	1	7.737	0.1	3.7	2.3
41	36	1	4000	8.58e-05	0.00738661	0.00063	0.00810236	8.10236	7.67499	0.00872618	8.72618	calcite	2	18.18	0.1	3.7	2.3
41	36	1	4000	8.58e-05	0.00895046	0.000925	0.00996122	9.96122	7.75839	0.0108943	10.8943	calcite	3	26.67	0.1	3.7	2.3
41	36	1	4000	8.58e-05	0.0102791	0.00122	0.0115848	11.5848	7.8185	0.0128244	12.8244	calcite	4	35.15	0.1	3.7	2.3
41	36	1	4000	8.58e-05	0.0112832	0.00147	0.012839	12.839	7.85898	0.014337	14.337	calcite	5	42.42	0.1	3.7	2.3
41	36	1	4000	8.58e-05	0.0119178	0.00164	0.0136436	13.6436	7.88274	0.0153167	15.3167	calcite	6	47.27	0.1	3.7	2.3
41	36	1	4000	8.58e-05	0.0125203	0.00181	0.014416	14.416	7.90416	0.016264	16.264	calcite	7	52.12	0.1	3.7	2.3
41	36	1	4000	8.58e-05	0.00517314	0.000309	0.00556789	5.56789	7.5203	0.00584914	5.84914	calcite	1	8.909	0.15	3.7	2.3
41	36	1	4000	8.58e-05	0.00809697	0.000757	0.00893973	8.93973	7.71487	0.00969711	9.69711	calcite	2	21.82	0.15	3.7	2.3
41	36	1	4000	8.58e-05	0.00971601	0.00109	0.0108918	10.8918	7.79403	0.0119965	11.9965	calcite	3	31.52	0.15	3.7	2.3
41	36	1	4000	8.58e-05	0.0111287	0.00143	0.0126444	12.6444	7.85299	0.0141011	14.1011	calcite	4	41.21	0.15	3.7	2.3
41	36	1	4000	8.58e-05	0.012205	0.00172	0.0140108	14.0108	7.89308	0.0157662	15.7662	calcite	5	49.7	0.15	3.7	2.3
41	36	1	4000	8.58e-05	0.0130951	0.00198	0.0151608	15.1608	7.92365	0.0171832	17.1832	calcite	6	56.97	0.15	3.7	2.3
41	36	1	4000	8.58e-05	0.0136139	0.00214	0.0158396	15.8396	7.94053	0.0180261	18.0261	calcite	7	61.82	0.15	3.7	2.3
41	36	1	4000	8.58e-05	0.00541844	0.000339	0.0058432	5.8432	7.54042	0.00615693	6.15693	calcite	1	9.788	0.2	3.7	2.3
41	36	1	4000	8.58e-05	0.00852932	0.00084	0.00945508	9.45508	7.73746	0.0102994	10.2994	calcite	2	24.24	0.2	3.7	2.3
41	36	1	4000	8.58e-05	0.0104462	0.00126	0.011792	11.792	7.8255	0.013073	13.073	calcite	3	36.36	0.2	3.7	2.3
41	36	1	4000	8.58e-05	0.0117716	0.0016	0.0134573	13.4573	7.87738	0.0150893	15.0893	calcite	4	46.06	0.2	3.7	2.3
41	36	1	4000	8.58e-05	0.0129287	0.00193	0.0149444	14.9444	7.9181	0.0169156	16.9156	calcite	5	55.76	0.2	3.7	2.3
41	36	1	4000	8.58e-05	0.0138972	0.00223	0.016213	16.2129	7.94947	0.0184915	18.4915	calcite	6	64.24	0.2	3.7	2.3
41	36	1	4000	8.58e-05	0.0144172	0.0024	0.0169029	16.9029	7.96542	0.0193554	19.3554	calcite	7	69.09	0.2	3.7	2.3
41	36	1	4000	8.58e-05	0.00573676	0.00038	0.00620251	6.20252	7.56521	0.00656042	6.56042	calcite	1	10.96	0.25	3.7	2.3
41	36	1	4000	8.58e-05	0.00895046	0.000925	0.00996122	9.96122	7.75839	0.0108943	10.8943	calcite	2	26.67	0.25	3.7	2.3
41	36	1	4000	8.58e-05	0.0109719	0.00139	0.0124477	12.4477	7.84683	0.0138631	13.8631	calcite	3	40	0.25	3.7	2.3
41	36	1	4000	8.58e-05	0.0123812	0.00177	0.0142369	14.2369	7.8993	0.0160438	16.0438	calcite	4	50.91	0.25	3.7	2.3
41	36	1	4000	8.58e-05	0.0136139	0.00214	0.0158396	15.8396	7.94053	0.0180261	18.0261	calcite	5	61.82	0.25	3.7	2.3
41	36	1	4000	8.58e-05	0.0145368	0.00244	0.0170626	17.0626	7.96901	0.019556	19.556	calcite	6	70.3	0.25	3.7	2.3
41	36	1	4000	8.58e-05	0.0151495	0.00265	0.0178852	17.8852	7.98694	0.0205931	20.5931	calcite	7	76.36	0.25	3.7	2.3
41	36	1	4000	8.58e-05	0.00588579	0.0004	0.00637155	6.37155	7.57635	0.00675093	6.75093	calcite	1	11.55	0.3	3.7	2.3
41	36	1	4000	8.58e-05	0.00915141	0.000967	0.0102042	10.2042	7.76803	0.011181	11.181	calcite	2	27.88	0.3	3.7	2.3
41	36	1	4000	8.58e-05	0.0112832	0.00147	0.012839	12.839	7.85898	0.014337	14.337	calcite	3	42.42	0.3	3.7	2.3
41	36	1	4000	8.58e-05	0.012794	0.00189	0.0147697	14.7697	7.91355	0.0166998	16.6998	calcite	4	54.55	0.3	3.7	2.3
41	36	1	4000	8.58e-05	0.0141443	0.00231	0.01654	16.54	7.95712	0.0189005	18.9005	calcite	5	66.67	0.3	3.7	2.3
41	36	1	4000	8.58e-05	0.01489	0.00256	0.0175358	17.5358	7.97944	0.0201517	20.1517	calcite	6	73.94	0.3	3.7	2.3
41	36	1	4000	8.58e-05	0.0157383	0.00286	0.0186841	18.6841	8.0035	0.0216062	21.6062	calcite	7	82.42	0.3	3.7	2.3

## Sheet: Fig 3I to L - simulation result
S (‰)	T (℃)	Patm	pCO2 （ppm)	CO2 (mol/kg)	[HCO3] (mol/kg)	[CO3] (mol/kg)	DIC (mol/kg)	DIC (10^3 μmol/kg)	pH	ALK (mol/kg)	ALK (10^3 μmol/kg)	Mineral	Ooid axes length (mm)	Ω	Tranport intermittency (f)	k (μmol/m^2/hr)	n
41	36	1	3000	6.43e-05	0.00384834	0.000228	0.00414066	4.14066	7.51675	0.00436192	4.36192	aragonite	3	4.525	0.01	45.1	2.4
41	36	1	3000	6.43e-05	0.00506529	0.000395	0.00552461	5.52461	7.63609	0.00592888	5.92888	aragonite	3	7.844	0.05	45.1	2.4
41	36	1	3000	6.43e-05	0.00580057	0.000518	0.00638289	6.38289	7.69495	0.00691938	6.91938	aragonite	3	10.28	0.1	45.1	2.4
41	36	1	3000	6.43e-05	0.00622199	0.000596	0.00688231	6.88231	7.72541	0.00750194	7.50194	aragonite	3	11.84	0.15	45.1	2.4
41	36	1	3000	6.43e-05	0.00656735	0.000664	0.00729567	7.29567	7.74887	0.00798745	7.98745	aragonite	3	13.18	0.2	45.1	2.4
41	36	1	3000	6.43e-05	0.00683868	0.00072	0.007623	7.623	7.76645	0.00837399	8.37399	aragonite	3	14.3	0.25	45.1	2.4
41	36	1	3000	6.43e-05	0.00709965	0.000776	0.00793997	7.93997	7.78272	0.00875001	8.75001	aragonite	3	15.42	0.3	45.1	2.4
41	36	1	4000	8.58e-05	0.00444367	0.000228	0.00475743	4.75743	7.45429	0.00495017	4.95017	aragonite	3	4.525	0.01	45.1	2.4
41	36	1	4000	8.58e-05	0.00584889	0.000395	0.00632964	6.32964	7.57362	0.00670366	6.70366	aragonite	3	7.844	0.05	45.1	2.4
41	36	1	4000	8.58e-05	0.00669791	0.000518	0.00730167	7.30167	7.63248	0.00780696	7.80696	aragonite	3	10.28	0.1	45.1	2.4
41	36	1	4000	8.58e-05	0.00718452	0.000596	0.00786628	7.86628	7.66294	0.0084542	8.4542	aragonite	3	11.84	0.15	45.1	2.4
41	36	1	4000	8.58e-05	0.00758331	0.000664	0.00833307	8.33307	7.6864	0.00899272	8.99272	aragonite	3	13.18	0.2	45.1	2.4
41	36	1	4000	8.58e-05	0.00789661	0.00072	0.00870237	8.70237	7.70398	0.00942092	9.42092	aragonite	3	14.3	0.25	45.1	2.4
41	36	1	4000	8.58e-05	0.00819795	0.000776	0.00905971	9.05971	7.72025	0.00983702	9.83702	aragonite	3	15.42	0.3	45.1	2.4
41	36	1	5000	0.000107197	0.00496817	0.000228	0.00530337	5.30337	7.40583	0.00546973	5.46973	aragonite	3	4.525	0.01	45.1	2.4
41	36	1	5000	0.000107197	0.00653924	0.000395	0.00704144	7.04144	7.52516	0.00738784	7.38784	aragonite	3	7.844	0.05	45.1	2.4
41	36	1	5000	0.000107197	0.00748848	0.000518	0.00811368	8.11368	7.58403	0.00859066	8.59066	aragonite	3	10.28	0.1	45.1	2.4
41	36	1	5000	0.000107197	0.00803252	0.000596	0.00873572	8.73572	7.61449	0.00929495	9.29495	aragonite	3	11.84	0.15	45.1	2.4
41	36	1	5000	0.000107197	0.00847838	0.000664	0.00924958	9.24958	7.63795	0.00988024	9.88024	aragonite	3	13.18	0.2	45.1	2.4
41	36	1	5000	0.000107197	0.00882867	0.00072	0.00965586	9.65586	7.65553	0.0103452	10.3452	aragonite	3	14.3	0.25	45.1	2.4
41	36	1	5000	0.000107197	0.00916558	0.000776	0.0100488	10.0488	7.67179	0.0107966	10.7966	aragonite	3	15.42	0.3	45.1	2.4
